# Supplementary material for: Supplemental Oxygen Alters the Airway Microbiome in Cystic Fibrosis
Source: PubMed Central journal article supplement (PMC9601246; doi:10.1128/msystems.00364-22), 2022-08-24
Supplement: msystems.00364-22-s0001.pdf [file msystems.00364-22-s0001.pdf]

| <b>Microbe</b>                      | <b>Coeff</b> | <b>StdErr</b> | <b>p</b> | <b>q</b> | <b>N&gt;0</b> |
|-------------------------------------|--------------|---------------|----------|----------|---------------|
| <i>Streptococcus sanguinis</i>      | -0.016       | 0.003         | 0.000    | 0.001    | 42            |
| <i>Rothia mucilaginosa</i>          | -0.019       | 0.005         | 0.000    | 0.012    | 43            |
| <i>Streptococcus gordonii</i>       | -0.011       | 0.003         | 0.002    | 0.030    | 48            |
| <i>Streptococcus mitis</i>          | -0.014       | 0.004         | 0.002    | 0.030    | 44            |
| <i>Actinomyces oris</i>             | -0.008       | 0.002         | 0.002    | 0.030    | 14            |
| <i>Streptococcus parasanguinis</i>  | -0.013       | 0.005         | 0.008    | 0.067    | 61            |
| <i>Candida albicans</i>             | -0.005       | 0.002         | 0.019    | 0.136    | 12            |
| <i>Aspergillus fumigatus</i>        | -0.007       | 0.003         | 0.023    | 0.155    | 12            |
| <i>Streptococcus vestibularis</i>   | -0.004       | 0.002         | 0.044    | 0.251    | 18            |
| <i>Schaalia odontolytica</i>        | -0.003       | 0.001         | 0.046    | 0.251    | 15            |
| <i>Streptococcus salivarius</i>     | -0.009       | 0.005         | 0.112    | 0.484    | 68            |
| <i>Rothia dentocariosa</i>          | -0.006       | 0.004         | 0.124    | 0.484    | 32            |
| <i>Streptococcus oralis</i>         | -0.007       | 0.005         | 0.125    | 0.484    | 56            |
| <i>Granulicatella elegans</i>       | -0.006       | 0.004         | 0.168    | 0.595    | 37            |
| <i>Streptococcus anginosus</i>      | -0.006       | 0.004         | 0.177    | 0.595    | 45            |
| <i>Granulicatella adiacens</i>      | -0.006       | 0.005         | 0.181    | 0.595    | 43            |
| <i>Streptococcus cristatus</i>      | -0.003       | 0.003         | 0.216    | 0.595    | 11            |
| <i>Streptococcus agalactiae</i>     | +0.005       | 0.005         | 0.339    | 0.740    | 14            |
| <i>Burkholderia multivorans</i>     | -0.002       | 0.003         | 0.420    | 0.841    | 15            |
| <i>Gemella sanguinis</i>            | -0.003       | 0.003         | 0.443    | 0.859    | 17            |
| <i>Pseudomonas aeruginosa</i>       | -0.006       | 0.008         | 0.468    | 0.859    | 50            |
| <i>Streptococcus infantis</i>       | -0.001       | 0.003         | 0.606    | 0.960    | 24            |
| <i>Staphylococcus aureus</i>        | -0.002       | 0.009         | 0.829    | 0.993    | 60            |
| <i>Abiotrophia defectiva</i>        | -0.000       | 0.001         | 0.849    | 0.993    | 10            |
| <i>Stenotrophomonas maltophilia</i> | -0.001       | 0.004         | 0.862    | 0.993    | 18            |
| <i>Serratia marcescens</i>          | +0.000       | 0.003         | 0.882    | 0.993    | 12            |
| <i>Staphylococcus argenteus</i>     | -0.000       | 0.005         | 0.929    | 0.993    | 55            |
| <i>Klebsiella pneumoniae</i>        | +0.000       | 0.007         | 0.955    | 0.993    | 17            |
| <i>Klebsiella quasipneumoniae</i>   | +0.000       | 0.004         | 0.973    | 0.993    | 14            |
| <i>Klebsiella variicola</i>         | +0.000       | 0.005         | 0.992    | 0.993    | 15            |
