# Supplementary material for: Supplemental Oxygen Alters the Airway Microbiome in Cystic Fibrosis
Source: PubMed Central journal article supplement (PMC9601246; doi:10.1128/msystems.00364-22), 2022-08-24
Supplement: msystems.00364-22-s0002.pdf [file msystems.00364-22-s0002.pdf]

| Pathway                                                                          | Coeff  | StdErr | p        | q        | N > 0 |
|----------------------------------------------------------------------------------|--------|--------|----------|----------|-------|
| PWY.5030.L.histidine.degradation.III                                             | -0.063 | 0.011  | 8.32E-08 | 5.45E-06 | 63    |
| P185.PWY.formaldehyde.assimilation.III..dihydroxyacetone.cycle.                  | -0.050 | 0.009  | 1.85E-07 | 9.07E-06 | 64    |
| PWY.5345.superpathway.of.L.methionine.biosynthesis..by.sulfhydrylation.          | -0.041 | 0.007  | 3.84E-07 | 1.12E-05 | 78    |
| PYRIDNUCSAL.PWY.NAD.salvage.pathway.I                                            | -0.039 | 0.007  | 9.78E-07 | 1.52E-05 | 66    |
| PWY.3781.aerobic.respiration.I..cytochrome.c.                                    | -0.043 | 0.008  | 1.04E-06 | 1.54E-05 | 90    |
| GLYCOCAT.PWY.glycogen.degradation.I..bacterial.                                  | -0.044 | 0.009  | 1.40E-06 | 1.75E-05 | 84    |
| PWY.7198.pyrimidine.deoxyribonucleotides.de.novo.biosynthesis.IV                 | -0.048 | 0.009  | 1.64E-06 | 1.96E-05 | 77    |
| PWY.7279.aerobic.respiration.II..cytochrome.c...yeast.                           | -0.044 | 0.009  | 1.99E-06 | 2.19E-05 | 87    |
| PWY66.389.phytol.degradation                                                     | -0.030 | 0.006  | 2.46E-06 | 2.51E-05 | 96    |
| PWY66.388.fatty.acid.alpha.oxidation.III                                         | -0.039 | 0.008  | 3.00E-06 | 2.91E-05 | 59    |
| PWY.7328.superpathway.of.UDP.glucose.derived.O.antigen.building.blocks.biosynthe | -0.064 | 0.013  | 4.21E-06 | 3.72E-05 | 62    |
| PWY.5920.superpathway.of.heme.biosynthesis.from.glycine                          | -0.045 | 0.009  | 4.46E-06 | 3.85E-05 | 87    |
| PWY.6527.stachyose.degradation                                                   | -0.041 | 0.008  | 4.97E-06 | 4.16E-05 | 77    |
| PWY.5747.2.methylcitrate.cycle.II                                                | -0.034 | 0.007  | 6.64E-06 | 5.16E-05 | 60    |
| MET.SAM.PWY.superpathway.of.S.adenosyl.L.methionine.biosynthesis                 | -0.019 | 0.004  | 7.12E-06 | 5.49E-05 | 98    |
| HOMOSER.METSYN.PWY.L.methionine.biosynthesis.I                                   | -0.020 | 0.004  | 7.89E-06 | 5.79E-05 | 98    |
| PWY30.19.ubiquinol.6.biosynthesis.from.4.hydroxybenzoate..eukaryotic.            | -0.032 | 0.007  | 8.33E-06 | 6.06E-05 | 22    |
| PWY.7383.anaerobic.energy.metabolism..invertebrates.cytosol.                     | -0.043 | 0.009  | 8.89E-06 | 6.29E-05 | 51    |
| PWY.5872.ubiquinol.10.biosynthesis..eukaryotic.                                  | -0.028 | 0.006  | 9.15E-06 | 6.37E-05 | 19    |
| PWY0.162.superpathway.of.pyrimidine.ribonucleotides.de.novo.biosynthesis         | -0.024 | 0.005  | 1.00E-05 | 6.84E-05 | 96    |
| SO4ASSIM.PWY.sulfate.reduction.I..assimilatory.                                  | -0.037 | 0.008  | 1.03E-05 | 6.96E-05 | 81    |
| METSYN.PWY.L.homoserine.and.L.methionine.biosynthesis                            | -0.018 | 0.004  | 1.05E-05 | 7.00E-05 | 98    |
| PWY.5347.superpathway.of.L.methionine.biosynthesis..transsulfuration.            | -0.018 | 0.004  | 1.06E-05 | 7.03E-05 | 98    |
| PWY.2723.trehalose.degradation.V                                                 | -0.047 | 0.010  | 1.07E-05 | 7.03E-05 | 82    |
| THISYNARA.PWY.superpathway.of.thiamin.diphosphate.biosynthesis.III..eukaryotes.  | -0.023 | 0.005  | 1.15E-05 | 7.43E-05 | 98    |
| PWY.5189.tetrapyrrole.biosynthesis.II..from.glycine.                             | -0.024 | 0.005  | 1.17E-05 | 7.45E-05 | 95    |
| PWY.5870.ubiquinol.8.biosynthesis..eukaryotic.                                   | -0.027 | 0.006  | 1.24E-05 | 7.68E-05 | 19    |
| PWY.5918.superpathay.of.heme.biosynthesis.from.glutamate                         | -0.040 | 0.009  | 1.26E-05 | 7.73E-05 | 88    |
| PANTO.PWY.phosphopantothenate.biosynthesis.I                                     | -0.022 | 0.005  | 1.38E-05 | 8.32E-05 | 98    |
| PWY.5871.ubiquinol.9.biosynthesis..eukaryotic.                                   | -0.028 | 0.006  | 1.42E-05 | 8.42E-05 | 19    |
| PWY.5873.ubiquinol.7.biosynthesis..eukaryotic.                                   | -0.028 | 0.006  | 1.42E-05 | 8.42E-05 | 19    |
| ARGININE.SYN4.PWY.L.ornithine.de.novo.biosynthesis                               | -0.038 | 0.008  | 1.52E-05 | 8.94E-05 | 79    |
| PWY.821.superpathway.of.sulfur.amino.acid.biosynthesis..Saccharomyces.cerevisiae | -0.034 | 0.007  | 1.58E-05 | 9.13E-05 | 70    |
| PANTOSYN.PWY.pantothenate.and.coenzyme.A.biosynthesis.I                          | -0.021 | 0.005  | 1.64E-05 | 9.37E-05 | 97    |
| HEME.BIOSYNTHESIS.II.heme.biosynthesis.I..aerobic.                               | -0.025 | 0.005  | 1.93E-05 | 1.07E-04 | 97    |
| PWY.6284.superpathway.of.unsaturated.fatty.acids.biosynthesis..E.coli.           | -0.047 | 0.010  | 2.03E-05 | 1.11E-04 | 64    |
| PENTOSE.P.PWY.pentose.phosphate.pathway                                          | -0.020 | 0.005  | 2.65E-05 | 1.36E-04 | 97    |
| PWY.5188.tetrapyrrole.biosynthesis.I..from.glutamate.                            | -0.018 | 0.004  | 2.99E-05 | 1.50E-04 | 95    |
| PWY.5173.superpathway.of.acetyl.CoA.biosynthesis                                 | -0.019 | 0.004  | 3.02E-05 | 1.50E-04 | 98    |
| PWY.841.superpathway.of.purine.nucleotides.de.novo.biosynthesis.I                | -0.017 | 0.004  | 3.22E-05 | 1.58E-04 | 98    |
| PWY66.399.gluconeogenesis.III                                                    | -0.039 | 0.009  | 3.51E-05 | 1.69E-04 | 47    |
| PWY.7539.6.hydroxymethyl.dihydropterin.diphosphate.biosynthesis.III..Chlamydia.  | -0.021 | 0.005  | 4.44E-05 | 2.10E-04 | 96    |
| PWY.5676.acetyl.CoA.fermentation.to.butanoate.II                                 | -0.038 | 0.009  | 4.98E-05 | 2.33E-04 | 50    |
| PWY.5941.glycogen.degradation.II..eukaryotic.                                    | -0.024 | 0.006  | 5.07E-05 | 2.35E-04 | 17    |
| CALVIN.PWY.Calvin.Benson.Bassham.cycle                                           | -0.020 | 0.005  | 5.37E-05 | 2.44E-04 | 95    |
| PWY.7357.thiamin.formation.from.pyrithiamine.and.oxythiamine..yeast.             | -0.021 | 0.005  | 5.99E-05 | 2.69E-04 | 97    |
| PWY.6147.6.hydroxymethyl.dihydropterin.diphosphate.biosynthesis.I                | -0.018 | 0.004  | 6.75E-05 | 2.91E-04 | 97    |
| SULFATE.CYS.PWY.superpathway.of.sulfate.assimilation.and.cysteine.biosynthesis   | -0.037 | 0.009  | 6.77E-05 | 2.91E-04 | 80    |
| PWY.6897.thiamin.salvage.II                                                      | -0.022 | 0.005  | 6.86E-05 | 2.93E-04 | 95    |
| RIBOSYN2.PWY.flavin.biosynthesis.I..bacteria.and.plants.                         | -0.021 | 0.005  | 7.24E-05 | 3.04E-04 | 94    |
| GLYCOLYSIS.glycolysis.I..from.glucose.6.phosphate.                               | -0.017 | 0.004  | 7.59E-05 | 3.14E-04 | 98    |
| DAPLYSINESYN.PWY.L.lysine.biosynthesis.I                                         | -0.033 | 0.008  | 7.73E-05 | 3.16E-04 | 89    |
| PWY.7039.phosphatidate.metabolism.as.a.signaling.molecule                        | -0.032 | 0.008  | 8.13E-05 | 3.29E-04 | 25    |
| HISTSYN.PWY.L.histidine.biosynthesis                                             | -0.013 | 0.003  | 8.47E-05 | 3.42E-04 | 98    |
| PWY.5097.L.lysine.biosynthesis.VI                                                | -0.037 | 0.009  | 9.54E-05 | 3.77E-04 | 92    |
| PWY.724.superpathway.of.L.lysine.L.threonine.and.L.methionine.biosynthesis.II    | -0.036 | 0.009  | 1.05E-04 | 4.11E-04 | 92    |
| PWY.5367.petroselinate.biosynthesis                                              | -0.040 | 0.010  | 1.10E-04 | 4.19E-04 | 65    |
| PWY.6859.all.trans.farnesol.biosynthesis                                         | -0.017 | 0.004  | 1.13E-04 | 4.28E-04 | 97    |
| PWY.5971.palmitate.biosynthesis.II..bacteria.and.plants.                         | -0.051 | 0.013  | 1.25E-04 | 4.64E-04 | 64    |
| P4.PWY.superpathway.of.L.lysine.L.threonine.and.L.methionine.biosynthesis.I      | -0.032 | 0.008  | 1.28E-04 | 4.72E-04 | 88    |
| DENITRIFICATION.PWY.nitrate.reduction.I..denitrification.                        | -0.026 | 0.007  | 1.32E-04 | 4.83E-04 | 55    |

| Pathway                                                                          | Coeff  | StdErr | p        | q        | N > 0 |
|----------------------------------------------------------------------------------|--------|--------|----------|----------|-------|
| TYRFUMCAT.PWY.L.tyrosine.degradation.I                                           | -0.025 | 0.006  | 1.33E-04 | 4.84E-04 | 59    |
| PWY.7197.pyrimidine.deoxyribonucleotide.phosphorylation                          | -0.012 | 0.003  | 1.35E-04 | 4.85E-04 | 98    |
| PWY.7211.superpathway.of.pyrimidine.deoxyribonucleotides.de.novo.biosynthesis    | -0.039 | 0.010  | 1.42E-04 | 5.03E-04 | 74    |
| P124.PWY.Bifidobacterium.shunt                                                   | -0.031 | 0.008  | 1.54E-04 | 5.38E-04 | 92    |
| PWY.5910.superpathway.of.geranylgeranyldiphosphate.biosynthesis.I.via.mevalonate | -0.028 | 0.007  | 1.57E-04 | 5.43E-04 | 90    |
| HSERMETANA.PWY.L.methionine.biosynthesis.III                                     | -0.020 | 0.005  | 1.57E-04 | 5.43E-04 | 97    |
| PWY.7208.superpathway.of.pyrimidine.nucleobases.salvage                          | -0.012 | 0.003  | 1.73E-04 | 5.90E-04 | 98    |
| GOLPDLCAT.PWY.superpathway.of.glycerol.degradation.to.13.propanediol             | -0.036 | 0.009  | 1.82E-04 | 6.16E-04 | 43    |
| PWY.5080.very.long.chain.fatty.acid.biosynthesis.I                               | -0.030 | 0.008  | 1.86E-04 | 6.21E-04 | 22    |
| PWY.6598.sciadonate.biosynthesis                                                 | -0.030 | 0.008  | 1.86E-04 | 6.21E-04 | 22    |
| PWY.7619.juniperonate.biosynthesis                                               | -0.030 | 0.008  | 1.86E-04 | 6.21E-04 | 22    |
| PWY.4981.L.proline.biosynthesis.II.from.arginine.                                | -0.017 | 0.004  | 1.93E-04 | 6.40E-04 | 98    |
| PWY.5484.glycolysis.II.from.fructose.6.phosphate.                                | -0.019 | 0.005  | 2.00E-04 | 6.62E-04 | 96    |
| TRPSYN.PWY.L.tryptophan.biosynthesis                                             | -0.016 | 0.004  | 2.07E-04 | 6.78E-04 | 98    |
| HEXITOLDEGSUPER.PWY.superpathway.of.hexitol.degradation..bacteria.               | -0.029 | 0.007  | 2.12E-04 | 6.93E-04 | 91    |
| PWY.5659.GDP.mannose.biosynthesis                                                | -0.022 | 0.006  | 2.18E-04 | 7.06E-04 | 95    |
| PWY.6163.chorismate.biosynthesis.from.3.dehydroquinate                           | -0.011 | 0.003  | 2.18E-04 | 7.06E-04 | 98    |
| P221.PWY.octane.oxidation                                                        | -0.025 | 0.006  | 2.21E-04 | 7.12E-04 | 87    |
| PWY.6628.superpathway.of.L.phenylalanine.biosynthesis                            | -0.030 | 0.008  | 2.26E-04 | 7.26E-04 | 75    |
| ARO.PWY.chorismate.biosynthesis.I                                                | -0.011 | 0.003  | 2.33E-04 | 7.40E-04 | 98    |
| ARGSYN.PWY.L.arginine.biosynthesis.I.via.L.ornithine.                            | -0.019 | 0.005  | 2.35E-04 | 7.40E-04 | 97    |
| COMPLETE.ARO.PWY.superpathway.of.aromatic.amino.acid.biosynthesis                | -0.011 | 0.003  | 2.38E-04 | 7.48E-04 | 98    |
| PWY.7228.superpathway.of.guanosine.nucleotides.de.novo.biosynthesis.I            | -0.012 | 0.003  | 2.43E-04 | 7.57E-04 | 98    |
| ANAEROFrucAT.PWY.homolactic.fermentation                                         | -0.019 | 0.005  | 2.50E-04 | 7.72E-04 | 96    |
| PHOSLIPSYN.PWY.superpathway.of.phospholipid.biosynthesis.I..bacteria.            | -0.032 | 0.008  | 2.64E-04 | 8.03E-04 | 90    |
| PWY.2941.L.lysine.biosynthesis.II                                                | -0.021 | 0.006  | 2.67E-04 | 8.06E-04 | 97    |
| GLCMANNANAUT.PWY.superpathway.of.N.acetylglucosamine.N.acetylmannosamine         | -0.026 | 0.007  | 2.71E-04 | 8.10E-04 | 95    |
| PWY.6168.flavin.biosynthesis.III..fungi.                                         | -0.019 | 0.005  | 2.77E-04 | 8.18E-04 | 94    |
| ARGSYNBSUB.PWY.L.arginine.biosynthesis.II..acetyl.cycle.                         | -0.012 | 0.003  | 2.80E-04 | 8.25E-04 | 98    |
| SER.GLYSYN.PWY.superpathway.of.L.serine.and.glycine.biosynthesis.I               | -0.012 | 0.003  | 2.88E-04 | 8.43E-04 | 98    |
| PWY.6285.superpathway.of.fatty.acids.biosynthesis..E.coli.                       | -0.042 | 0.011  | 2.88E-04 | 8.43E-04 | 53    |
| PWY.6125.superpathway.of.guanosine.nucleotides.de.novo.biosynthesis.II           | -0.011 | 0.003  | 2.96E-04 | 8.60E-04 | 98    |
| GLUCOSE1PMETAB.PWY.glucose.and.glucose.1.phosphate.degradation                   | -0.040 | 0.011  | 2.96E-04 | 8.60E-04 | 84    |
| PWY0.1298.superpathway.of.pyrimidine.deoxyribonucleosides.degradation            | -0.029 | 0.008  | 3.02E-04 | 8.72E-04 | 91    |
| X1CMET2.PWY.N10.formyl.tetrahydrofolate.biosynthesis                             | -0.010 | 0.003  | 3.07E-04 | 8.85E-04 | 98    |
| PWY.2942.L.lysine.biosynthesis.III                                               | -0.011 | 0.003  | 3.17E-04 | 9.06E-04 | 98    |
| DENOVOPURINE2.PWY.superpathway.of.purine.nucleotides.de.novo.biosynthesis.II     | -0.011 | 0.003  | 3.22E-04 | 9.16E-04 | 98    |
| GLUTORN.PWY.L.ornithine.biosynthesis                                             | -0.021 | 0.006  | 3.23E-04 | 9.16E-04 | 97    |
| PWY.5855.ubiquinol.7.biosynthesis..prokaryotic.                                  | -0.030 | 0.008  | 3.51E-04 | 9.78E-04 | 76    |
| PWY.5856.ubiquinol.9.biosynthesis..prokaryotic.                                  | -0.030 | 0.008  | 3.51E-04 | 9.78E-04 | 76    |
| PWY.5857.ubiquinol.10.biosynthesis..prokaryotic.                                 | -0.030 | 0.008  | 3.51E-04 | 9.78E-04 | 76    |
| PWY.6708.ubiquinol.8.biosynthesis..prokaryotic.                                  | -0.030 | 0.008  | 3.51E-04 | 9.78E-04 | 76    |
| FASYN.ELONG.PWY.fatty.acid.elongation.saturated                                  | -0.032 | 0.009  | 3.64E-04 | 1.01E-03 | 93    |
| POLYISOPRENSYN.PWY.polyisoprenoid.biosynthesis..E.coli.                          | -0.017 | 0.004  | 3.65E-04 | 1.01E-03 | 97    |
| GLUCONEO.PWY.gluconeogenesis.I                                                   | -0.032 | 0.009  | 3.75E-04 | 1.03E-03 | 86    |
| PWY.6470.peptidoglycan.biosynthesis.V..beta.lactam.resistance.                   | -0.020 | 0.005  | 3.80E-04 | 1.04E-03 | 21    |
| PWY.5514.UDP.N.acetyl.D.galactosamine.biosynthesis.II                            | -0.021 | 0.006  | 3.88E-04 | 1.06E-03 | 17    |
| PWY.6588.pyruvate.fermentation.to.acetone                                        | -0.036 | 0.010  | 4.14E-04 | 1.11E-03 | 54    |
| PWY.6126.superpathway.of.adenosine.nucleotides.de.novo.biosynthesis.II           | -0.010 | 0.003  | 4.15E-04 | 1.11E-03 | 98    |
| COLANSYN.PWY.colanic.acid.building.blocks.biosynthesis                           | -0.032 | 0.009  | 4.19E-04 | 1.12E-03 | 61    |
| PWY.7323.superpathway.of.GDP.mannose.derived.O.antigen.building.blocks.biosynt   | -0.034 | 0.009  | 4.39E-04 | 1.17E-03 | 62    |
| PWY.5154.L.arginine.biosynthesis.III.via.N.acetyl.L.citrulline.                  | -0.031 | 0.009  | 4.63E-04 | 1.20E-03 | 93    |
| PWY.7282.4.amino.2.methyl.5.phosphomethylpyrimidine.biosynthesis..yeast.         | -0.024 | 0.007  | 4.77E-04 | 1.24E-03 | 91    |
| PWY.7229.superpathway.of.adenosine.nucleotides.de.novo.biosynthesis.I            | -0.010 | 0.003  | 4.80E-04 | 1.24E-03 | 98    |
| NAD.BIOSYNTHESIS.II.NAD.salvage.pathway.II                                       | -0.035 | 0.010  | 0.001    | 0.001    | 85    |
| PWY.7268.NAD.NADP.NADH.NADPH.cytosolic.interconversion..yeast.                   | -0.032 | 0.009  | 0.001    | 0.001    | 65    |
| GLYCOLYSIS.E.D.superpathway.of.glycolysis.and.Entner.Doudoroff                   | -0.029 | 0.008  | 0.001    | 0.001    | 88    |
| PWY.5686.UMP.biosynthesis                                                        | -0.010 | 0.003  | 0.001    | 0.002    | 98    |
| PWY.922.mevalonate.pathway.I                                                     | -0.028 | 0.008  | 0.001    | 0.002    | 91    |
| PWY.7288.fatty.acid.beta.oxidation..peroxisome.yeast.                            | -0.024 | 0.007  | 0.001    | 0.002    | 56    |
| PWY.7117.C4.photosynthetic.carbon.assimilation.cycle.PEPCK.type                  | -0.027 | 0.008  | 0.001    | 0.002    | 94    |

| Pathway                                                                       | Coeff  | StdErr | p     | q     | N > 0 |
|-------------------------------------------------------------------------------|--------|--------|-------|-------|-------|
| HISDEG.PWY.L.histidine.degradation.I                                          | -0.016 | 0.004  | 0.001 | 0.002 | 98    |
| PWY.4984.urea.cycle                                                           | -0.029 | 0.008  | 0.001 | 0.002 | 86    |
| PWY.6385.peptidoglycan.biosynthesis.III..mycobacteria.                        | -0.011 | 0.003  | 0.001 | 0.002 | 98    |
| UDPNACETYLGALSYN.PWY.UDP.N.acetyl.D.glucosamine.biosynthesis.II               | -0.028 | 0.008  | 0.001 | 0.002 | 33    |
| PPGPPMET.PWY.ppGpp.biosynthesis                                               | -0.026 | 0.007  | 0.001 | 0.002 | 74    |
| PWY.6700.queuosine.biosynthesis                                               | -0.011 | 0.003  | 0.001 | 0.002 | 98    |
| PWY.6124.inosine.5.phosphate.biosynthesis.II                                  | -0.010 | 0.003  | 0.001 | 0.002 | 98    |
| PWY.3841.folate.transformations.II                                            | -0.010 | 0.003  | 0.001 | 0.002 | 98    |
| PWY0.781.aspartate.superpathway                                               | -0.028 | 0.008  | 0.001 | 0.002 | 77    |
| NONOXIPENT.PWY.pentose.phosphate.pathway..non.oxidative.branch.               | -0.010 | 0.003  | 0.001 | 0.002 | 98    |
| POLYAMINSYN3.PWY.superpathway.of.polyamine.biosynthesis.II                    | -0.029 | 0.008  | 0.001 | 0.002 | 53    |
| PEPTIDOGLYCANSYN.PWY.peptidoglycan.biosynthesis.I..meso.diaminopimelate.cor   | -0.010 | 0.003  | 0.001 | 0.002 | 98    |
| PWY.5104.L.isoleucine.biosynthesis.IV                                         | -0.020 | 0.006  | 0.001 | 0.002 | 88    |
| PWY.6471.peptidoglycan.biosynthesis.IV..Enterococcus.faecium.                 | -0.019 | 0.006  | 0.001 | 0.002 | 95    |
| PWY.7663.gondoate.biosynthesis..anaerobic.                                    | -0.023 | 0.007  | 0.001 | 0.002 | 95    |
| UDPNAGSYN.PWY.UDP.N.acetyl.D.glucosamine.biosynthesis.I                       | -0.010 | 0.003  | 0.001 | 0.002 | 98    |
| PWY.6282.palmitoleate.biosynthesis.I..from..5Z..dodec.5.enoate.               | -0.030 | 0.009  | 0.001 | 0.002 | 92    |
| OANTIGEN.PWY.O.antigen.building.blocks.biosynthesis..E.coli.                  | -0.023 | 0.007  | 0.001 | 0.002 | 95    |
| CITRULBIO.PWY.L.citrulline.biosynthesis                                       | -0.026 | 0.008  | 0.001 | 0.002 | 87    |
| PWY.7220.adenosine.deoxyribonucleotides.de.novo.biosynthesis.II               | -0.010 | 0.003  | 0.001 | 0.002 | 98    |
| PWY.7222.guanosine.deoxyribonucleotides.de.novo.biosynthesis.II               | -0.010 | 0.003  | 0.001 | 0.002 | 98    |
| PWY.7664.oleate.biosynthesis.IV..anaerobic.                                   | -0.030 | 0.009  | 0.001 | 0.002 | 92    |
| PWY.5177.glutaryl.CoA.degradation                                             | -0.029 | 0.009  | 0.001 | 0.002 | 57    |
| PWY.5913.TCA.cycle.VI..obligate.autotrophs.                                   | -0.030 | 0.009  | 0.001 | 0.002 | 77    |
| PWY66.391.fatty.acid.beta.oxidation.VI..peroxisome.                           | -0.023 | 0.007  | 0.001 | 0.003 | 56    |
| PWY.6123.inosine.5.phosphate.biosynthesis.I                                   | -0.009 | 0.003  | 0.001 | 0.003 | 98    |
| PWY0.862..5Z..dodec.5.enoate.biosynthesis                                     | -0.030 | 0.009  | 0.001 | 0.003 | 92    |
| PWY.7219.adenosine.ribonucleotides.de.novo.biosynthesis                       | -0.009 | 0.003  | 0.001 | 0.003 | 98    |
| PWY.5136.fatty.acid.beta.oxidation.III..peroxisome.                           | -0.029 | 0.008  | 0.001 | 0.003 | 87    |
| PWY.7234.inosine.5.phosphate.biosynthesis.III                                 | -0.009 | 0.003  | 0.001 | 0.003 | 98    |
| GLYCOGENSYNTH.PWY.glycogen.biosynthesis.I..from.ADP.D.Glucose.                | -0.016 | 0.005  | 0.001 | 0.003 | 96    |
| DTDPRHAMSYN.PWY.dTDP.L.rhamnose.biosynthesis.I                                | -0.020 | 0.006  | 0.001 | 0.003 | 96    |
| PWY0.1319.CDP.diacylglycerol.biosynthesis.II                                  | -0.009 | 0.003  | 0.001 | 0.003 | 98    |
| PWY.5667.CDP.diacylglycerol.biosynthesis.I                                    | -0.009 | 0.003  | 0.001 | 0.003 | 98    |
| PWY.5651.L.tryptophan.degradation.to.2.amino.3.carboxymuconate.semialdehyde   | -0.028 | 0.009  | 0.001 | 0.003 | 26    |
| PWY.7221.guanosine.ribonucleotides.de.novo.biosynthesis                       | -0.010 | 0.003  | 0.001 | 0.003 | 98    |
| PWY.4242.pantothenate.and.coenzyme.A.biosynthesis.III                         | -0.009 | 0.003  | 0.001 | 0.003 | 98    |
| PWY0.1586.peptidoglycan.maturation..meso.diaminopimelate.containing.          | -0.011 | 0.003  | 0.001 | 0.003 | 98    |
| PWY.6545.pyrimidine.deoxyribonucleotides.de.novo.biosynthesis.III             | -0.031 | 0.009  | 0.001 | 0.003 | 58    |
| PWY.6660.2.heptyl.3.hydroxy.4.1H..quinolone.biosynthesis                      | -0.022 | 0.007  | 0.001 | 0.003 | 48    |
| ASPASN.PWY.superpathway.of.L.aspartate.and.L.asparagine.biosynthesis          | -0.012 | 0.004  | 0.001 | 0.003 | 93    |
| PWY.6662.superpathway.of.quinolone.and.alkylquinolone.biosynthesis            | -0.022 | 0.007  | 0.001 | 0.003 | 48    |
| PWY.6612.superpathway.of.tetrahydrofolate.biosynthesis                        | -0.017 | 0.005  | 0.001 | 0.003 | 90    |
| PWY.7411.superpathway.of.phosphatidate.biosynthesis..yeast.                   | -0.013 | 0.004  | 0.002 | 0.003 | 10    |
| COBALSYN.PWY.adenosylcobalamin.salvage.from.cobinamide.I                      | -0.033 | 0.010  | 0.002 | 0.003 | 68    |
| ILEUSYN.PWY.L.isoleucine.biosynthesis.I..from.threonine.                      | -0.009 | 0.003  | 0.002 | 0.003 | 98    |
| VALSYN.PWY.L.valine.biosynthesis                                              | -0.009 | 0.003  | 0.002 | 0.003 | 98    |
| BRANCHED.CHAIN.AA.SYN.PWY.superpathway.of.branched.amino.acid.biosynthesi     | -0.009 | 0.003  | 0.002 | 0.003 | 98    |
| PWY.5695.urate.biosynthesis.inosine.5.phosphate.degradation                   | -0.010 | 0.003  | 0.002 | 0.003 | 98    |
| PWY.3001.superpathway.of.L.isoleucine.biosynthesis.I                          | -0.009 | 0.003  | 0.002 | 0.003 | 98    |
| PWY.5103.L.isoleucine.biosynthesis.III                                        | -0.009 | 0.003  | 0.002 | 0.003 | 98    |
| FOLSYN.PWY.superpathway.of.tetrahydrofolate.biosynthesis.and.salvage          | -0.016 | 0.005  | 0.002 | 0.004 | 90    |
| FAO.PWY.fatty.acid.beta.oxidation.I                                           | -0.031 | 0.010  | 0.002 | 0.004 | 88    |
| PWY.7388.octanoyl..acyl.carrier.protein..biosynthesis..mitochondria.yeast.    | -0.024 | 0.007  | 0.002 | 0.004 | 95    |
| PWY.7400.L.arginine.biosynthesis.IV..archaeobacteria.                         | -0.016 | 0.005  | 0.002 | 0.004 | 96    |
| THRESYN.PWY.superpathway.of.L.threonine.biosynthesis                          | -0.009 | 0.003  | 0.002 | 0.004 | 98    |
| PWY.6737.starch.degradation.V                                                 | -0.015 | 0.005  | 0.002 | 0.004 | 95    |
| COA.PWY.1.coenzyme.A.biosynthesis.II..mammalian.                              | -0.009 | 0.003  | 0.002 | 0.004 | 98    |
| PWY.5989.stearate.biosynthesis.II..bacteria.and.plants.                       | -0.028 | 0.009  | 0.002 | 0.004 | 92    |
| PWY.7111.pyruvate.fermentation.to.isobutanol..engineered.                     | -0.009 | 0.003  | 0.002 | 0.004 | 98    |
| FASYN.INITIAL.PWY.superpathway.of.fatty.acid.biosynthesis.initiation..E.coli. | -0.023 | 0.007  | 0.002 | 0.004 | 95    |

| Pathway                                                                           | Coeff  | StdErr | p     | q     | N > 0 |
|-----------------------------------------------------------------------------------|--------|--------|-------|-------|-------|
| COA.PWY.coenzyme.A.biosynthesis.I                                                 | -0.009 | 0.003  | 0.002 | 0.004 | 98    |
| ARGORNPROST.PWY.arginine.ornithine.and.proline.interconversion                    | -0.020 | 0.006  | 0.002 | 0.005 | 81    |
| PWY.6629.superpathway.of.L.tryptophan.biosynthesis                                | -0.022 | 0.007  | 0.003 | 0.005 | 42    |
| PWY.6122.5.aminoimidazole.ribonucleotide.biosynthesis.II                          | -0.009 | 0.003  | 0.003 | 0.006 | 98    |
| PWY.6277.superpathway.of.5.aminoimidazole.ribonucleotide.biosynthesis             | -0.009 | 0.003  | 0.003 | 0.006 | 98    |
| PWY.6703.preQ0.biosynthesis                                                       | -0.009 | 0.003  | 0.003 | 0.006 | 98    |
| PWY.6121.5.aminoimidazole.ribonucleotide.biosynthesis.I                           | -0.008 | 0.003  | 0.003 | 0.006 | 98    |
| PWY.6387.UDP.N.acetylmuramoyl.pentapeptide.biosynthesis.I..meso.diaminopimelate   | -0.008 | 0.003  | 0.003 | 0.006 | 98    |
| LEU.DEG2.PWY.L.leucine.degradation.I                                              | -0.025 | 0.008  | 0.004 | 0.007 | 38    |
| PWY.7118.chitin.degradation.to.ethanol                                            | -0.025 | 0.008  | 0.004 | 0.007 | 23    |
| PWY.7187.pyrimidine.deoxyribonucleotides.de.novo.biosynthesis.II                  | -0.015 | 0.005  | 0.004 | 0.007 | 98    |
| PWY.7184.pyrimidine.deoxyribonucleotides.de.novo.biosynthesis.I                   | -0.015 | 0.005  | 0.004 | 0.007 | 98    |
| TRNA.CHARGING.PWY.tRNA.charging                                                   | -0.008 | 0.003  | 0.004 | 0.007 | 98    |
| PWY1G.0.mycothiol.biosynthesis                                                    | -0.018 | 0.006  | 0.004 | 0.007 | 12    |
| PWY.7115.C4.photosynthetic.carbon.assimilation.cycle.NAD.ME.type                  | -0.026 | 0.009  | 0.004 | 0.007 | 54    |
| PWY0.1533.methylphosphonate.degradation.I                                         | -0.021 | 0.007  | 0.004 | 0.007 | 48    |
| PWY.6386.UDP.N.acetylmuramoyl.pentapeptide.biosynthesis.II..lysine.containing.    | -0.008 | 0.003  | 0.004 | 0.007 | 98    |
| NADSYN.PWY.NAD.biosynthesis.II..from.tryptophan.                                  | -0.023 | 0.008  | 0.004 | 0.008 | 25    |
| PYRIDNUCSYN.PWY.NAD.biosynthesis.I..from.aspartate.                               | -0.027 | 0.009  | 0.004 | 0.008 | 76    |
| PWY.6895.superpathway.of.thiamin.diphosphate.biosynthesis.II                      | -0.031 | 0.010  | 0.004 | 0.008 | 35    |
| P461.PWY.hexitol.fermentation.to.lactate.formate.ethanol.and.acetate              | -0.024 | 0.008  | 0.005 | 0.009 | 81    |
| PWY.5973.cis.vaccenate.biosynthesis                                               | -0.026 | 0.009  | 0.005 | 0.009 | 93    |
| GLYOXYLATE.BYPASS.glyoxylate.cycle                                                | -0.035 | 0.012  | 0.005 | 0.010 | 63    |
| ANAGLYCOLYSIS.PWY.glycolysis.III..from.glucose.                                   | -0.008 | 0.003  | 0.006 | 0.010 | 98    |
| PWY.6936.seleno.amino.acid.biosynthesis                                           | -0.008 | 0.003  | 0.006 | 0.010 | 98    |
| TCA.TCA.cycle.I..prokaryotic.                                                     | -0.032 | 0.011  | 0.006 | 0.010 | 71    |
| PWY.4321.L.glutamate.degradation.IV                                               | -0.016 | 0.006  | 0.006 | 0.010 | 10    |
| PWY1F.823.leucopelargonidin.and.leucocyanidin.biosynthesis                        | -0.018 | 0.006  | 0.006 | 0.010 | 25    |
| PWY.7094.fatty.acid.salvage                                                       | -0.020 | 0.007  | 0.006 | 0.010 | 49    |
| PWY.7003.glycerol.degradation.to.butanol                                          | -0.022 | 0.008  | 0.006 | 0.010 | 34    |
| PWY0.166.superpathway.of.pyrimidine.deoxyribonucleotides.de.novo.biosynthesis..E. | -0.014 | 0.005  | 0.006 | 0.010 | 98    |
| VALDEG.PWY.L.valine.degradation.I                                                 | -0.014 | 0.005  | 0.007 | 0.011 | 10    |
| TCA.GLYOX.BYPASS.superpathway.of.glyoxylate.bypass.and.TCA                        | -0.033 | 0.012  | 0.007 | 0.012 | 63    |
| PWY.7237.myo.chiro.and.scillo.inositol.degradation                                | -0.030 | 0.011  | 0.008 | 0.013 | 82    |
| PWY.6318.L.phenylalanine.degradation.IV..mammalian.via.side.chain.                | -0.033 | 0.012  | 0.009 | 0.014 | 77    |
| PWY0.1297.superpathway.of.purine.deoxyribonucleosides.degradation                 | -0.019 | 0.007  | 0.009 | 0.015 | 89    |
| PWY.6992.15.anhydrofructose.degradation                                           | -0.013 | 0.005  | 0.009 | 0.015 | 11    |
| PWY.6562.norspermidine.biosynthesis                                               | -0.006 | 0.002  | 0.009 | 0.015 | 12    |
| LACTOSECAT.PWY.lactose.and.galactose.degradation.I                                | -0.009 | 0.003  | 0.009 | 0.015 | 89    |
| PWY.6891.thiazole.biosynthesis.II..Bacillus.                                      | -0.026 | 0.010  | 0.009 | 0.015 | 35    |
| PWY66.400.glycolysis.VI..metazoan.                                                | -0.008 | 0.003  | 0.009 | 0.015 | 98    |
| P125.PWY.superpathway.of..RR..butanediol.biosynthesis                             | -0.012 | 0.005  | 0.010 | 0.016 | 92    |
| METHGLYUT.PWY.superpathway.of.methylglyoxal.degradation                           | -0.031 | 0.012  | 0.010 | 0.016 | 53    |
| P165.PWY.superpathway.of.purines.degradation.in.plants                            | -0.021 | 0.008  | 0.010 | 0.016 | 19    |
| URSIN.PWY.ureide.biosynthesis                                                     | -0.018 | 0.007  | 0.010 | 0.016 | 51    |
| PWY0.1479.tRNA.processing                                                         | -0.030 | 0.012  | 0.010 | 0.016 | 80    |
| PYRIDOXSYN.PWY.pyridoxal.5.phosphate.biosynthesis.I                               | -0.029 | 0.011  | 0.010 | 0.017 | 82    |
| PWY0.845.superpathway.of.pyridoxal.5.phosphate.biosynthesis.and.salvage           | -0.027 | 0.011  | 0.011 | 0.018 | 82    |
| GLYCOLYSIS.TCA.GLYOX.BYPASS.superpathway.of.glycolysis.pyruvate.dehydroger        | -0.029 | 0.011  | 0.012 | 0.019 | 63    |
| PWY.7391.isoprene.biosynthesis.II..engineered.                                    | -0.024 | 0.009  | 0.012 | 0.019 | 61    |
| PWY.7196.superpathway.of.pyrimidine.ribonucleosides.salvage                       | -0.022 | 0.009  | 0.012 | 0.020 | 52    |
| PWY.6317.galactose.degradation.I..Leloir.pathway.                                 | -0.017 | 0.007  | 0.012 | 0.020 | 85    |
| PWY.5265.peptidoglycan.biosynthesis.II..staphylococci.                            | -0.015 | 0.006  | 0.012 | 0.020 | 78    |
| PWY66.367.ketogenesis                                                             | -0.030 | 0.012  | 0.012 | 0.020 | 47    |
| PWY.6748.nitrate.reduction.VII..denitrification.                                  | -0.010 | 0.004  | 0.012 | 0.020 | 36    |
| P441.PWY.superpathway.of.N.acetylneuraminate.degradation                          | -0.029 | 0.012  | 0.013 | 0.021 | 75    |
| PWY.241.C4.photosynthetic.carbon.assimilation.cycle.NADP.ME.type                  | -0.022 | 0.009  | 0.015 | 0.024 | 55    |
| PWY66.422.D.galactose.degradation.V..Leloir.pathway.                              | -0.016 | 0.006  | 0.015 | 0.024 | 91    |
| PWY.6182.superpathway.of.salicylate.degradation                                   | -0.025 | 0.010  | 0.015 | 0.024 | 65    |
| PWY.6151.S.adenosyl.L.methionine.cycle.I                                          | -0.007 | 0.003  | 0.016 | 0.025 | 98    |
| PWY.6185.4.methylcatechol.degradation..ortho.cleavage.                            | -0.024 | 0.010  | 0.016 | 0.025 | 65    |

| Pathway                                                                           | Coeff  | StdErr | p     | q     | N > 0 |
|-----------------------------------------------------------------------------------|--------|--------|-------|-------|-------|
| PWY.7269.NAD.NADP.NADH.NADPH.mitochondrial.interconversion..yeast.                | -0.026 | 0.011  | 0.017 | 0.027 | 71    |
| PWY.4041.gamma.glutamyl.cycle                                                     | -0.018 | 0.007  | 0.018 | 0.028 | 84    |
| THISYN.PWY.superpathway.of.thiamin.diphosphate.biosynthesis.I                     | -0.028 | 0.012  | 0.019 | 0.029 | 46    |
| PWY.6969.TCA.cycle.V..2.oxoglutarate.ferredoxin.oxidoreductase.                   | -0.028 | 0.012  | 0.020 | 0.031 | 51    |
| PWY.6608.guanosine.nucleotides.degradation.III                                    | -0.024 | 0.010  | 0.020 | 0.031 | 83    |
| PWY.1042.glycolysis.IV..plant.cytosol.                                            | -0.007 | 0.003  | 0.021 | 0.032 | 98    |
| PWY.6609.adenine.and.adenosine.salvage.III                                        | -0.007 | 0.003  | 0.021 | 0.033 | 98    |
| NAGLIPASYN.PWY.lipid.IVA.biosynthesis                                             | -0.021 | 0.009  | 0.022 | 0.033 | 79    |
| PWY.3801.sucrose.degradation.II..sucrose.synthase.                                | -0.022 | 0.009  | 0.022 | 0.033 | 64    |
| PWY.6606.guanosine.nucleotides.degradation.II                                     | -0.025 | 0.011  | 0.022 | 0.033 | 82    |
| PWY3O.355.stearate.biosynthesis.III..fungi.                                       | -0.017 | 0.008  | 0.023 | 0.034 | 15    |
| PWY.7345.superpathway.of.anaerobic.sucrose.degradation                            | -0.022 | 0.009  | 0.024 | 0.036 | 64    |
| PWY.7616.methanol.oxidation.to.carbon.dioxide                                     | -0.019 | 0.008  | 0.025 | 0.037 | 25    |
| PWY0.1261.anhydromuropeptides.recycling                                           | -0.021 | 0.009  | 0.025 | 0.037 | 91    |
| PWY.5840.superpathway.of.menaquinol.7.biosynthesis                                | -0.011 | 0.005  | 0.026 | 0.038 | 81    |
| PWY.5723.Rubisco.shunt                                                            | -0.024 | 0.011  | 0.026 | 0.038 | 47    |
| PWY.5181.toluene.degradation.III..aerobic...via.p.cresol.                         | -0.022 | 0.009  | 0.026 | 0.038 | 61    |
| PRPP.PWY.superpathway.of.histidine.purine.and.pyrimidine.biosynthesis             | -0.019 | 0.009  | 0.029 | 0.042 | 56    |
| UBISYN.PWY.superpathway.of.ubiquinol.8.biosynthesis..prokaryotic.                 | -0.026 | 0.011  | 0.029 | 0.042 | 43    |
| PWY.5100.pyruvate.fermentation.to.acetate.and.lactate.II                          | -0.006 | 0.003  | 0.030 | 0.043 | 98    |
| CATECHOL.ORTHO.CLEAVAGE.PWY.catechol.degradation.to.beta.ketoadipate              | -0.021 | 0.010  | 0.030 | 0.043 | 67    |
| PWY.5897.superpathway.of.menaquinol.11.biosynthesis                               | -0.011 | 0.005  | 0.030 | 0.043 | 81    |
| PWY.5898.superpathway.of.menaquinol.12.biosynthesis                               | -0.011 | 0.005  | 0.030 | 0.043 | 81    |
| PWY.5899.superpathway.of.menaquinol.13.biosynthesis                               | -0.011 | 0.005  | 0.030 | 0.043 | 81    |
| PWY.5417.catechol.degradation.III..ortho.cleavage.pathway.                        | -0.022 | 0.010  | 0.030 | 0.043 | 66    |
| PWY.5431.aromatic.compounds.degradation.via.beta.ketoadipate                      | -0.022 | 0.010  | 0.030 | 0.043 | 66    |
| PWY0.1338.polymyxin.resistance                                                    | -0.018 | 0.008  | 0.030 | 0.044 | 58    |
| PWY66.409.superpathway.of.purine.nucleotide.salvage                               | -0.016 | 0.007  | 0.031 | 0.045 | 86    |
| PWY.5863.superpathway.of.phylloquinol.biosynthesis                                | -0.010 | 0.005  | 0.031 | 0.045 | 81    |
| PWY.7200.superpathway.of.pyrimidine.deoxyribonucleoside.salvage                   | -0.006 | 0.003  | 0.033 | 0.047 | 58    |
| P101.PWY.ectoine.biosynthesis                                                     | -0.007 | 0.003  | 0.034 | 0.049 | 17    |
| PWY.7209.superpathway.of.pyrimidine.ribonucleosides.degradation                   | -0.013 | 0.006  | 0.035 | 0.050 | 16    |
| PWY0.1241.ADP.L.glycero.beta.D.manno.heptose.biosynthesis                         | -0.016 | 0.008  | 0.037 | 0.052 | 57    |
| PROTocatechuate.ORTHO.CLEAVAGE.PWY.protocatechuate.degradation.II..ort            | -0.018 | 0.009  | 0.038 | 0.053 | 65    |
| HEMESYN2.PWY.heme.biosynthesis.II..anaerobic.                                     | -0.018 | 0.009  | 0.039 | 0.055 | 35    |
| AST.PWY.L.arginine.degradation.II..AST.pathway.                                   | -0.022 | 0.011  | 0.040 | 0.056 | 66    |
| PWY0.881.superpathway.of.fatty.acid.biosynthesis.I..E.coli.                       | -0.015 | 0.007  | 0.042 | 0.059 | 32    |
| PWY.5791.14.dihydroxy.2.naphthoate.biosynthesis.II..plants.                       | -0.010 | 0.005  | 0.044 | 0.061 | 81    |
| PWY.5837.14.dihydroxy.2.naphthoate.biosynthesis.I                                 | -0.010 | 0.005  | 0.044 | 0.061 | 81    |
| PWY.6519.8.amino.7.oxononanoate.biosynthesis.I                                    | -0.020 | 0.010  | 0.046 | 0.063 | 76    |
| PWY.5838.superpathway.of.menaquinol.8.biosynthesis.I                              | -0.023 | 0.012  | 0.048 | 0.067 | 43    |
| KETOGLUCONMET.PWY.ketogluconate.metabolism                                        | -0.018 | 0.009  | 0.048 | 0.067 | 68    |
| PWY4LZ.257.superpathway.of.fermentation..Chlamydomonas.reinhardtii.               | -0.016 | 0.008  | 0.049 | 0.068 | 53    |
| PWY.6892.thiazole.biosynthesis.I..E.coli.                                         | -0.022 | 0.011  | 0.050 | 0.069 | 46    |
| BIOTIN.BIOSYNTHESIS.PWY.biotin.biosynthesis.I                                     | -0.020 | 0.010  | 0.050 | 0.069 | 76    |
| PWY.5861.superpathway.of.demethylmenaquinol.8.biosynthesis                        | -0.023 | 0.012  | 0.055 | 0.075 | 43    |
| PWY.6837.fatty.acid.beta.oxidation.V..unsaturated.odd.number.di.isomerase.depends | -0.016 | 0.008  | 0.060 | 0.081 | 58    |
| PWY.5509.adenosylcobalamin.biosynthesis.from.cobyrinate.ac.diamide.I              | -0.006 | 0.003  | 0.060 | 0.082 | 11    |
| P164.PWY.purine.nucleobases.degradation.I..anaerobic.                             | -0.011 | 0.006  | 0.064 | 0.086 | 16    |
| PWY.7245.superpathway.NAD.NADP.NADH.NADPH.interconversion..yeast.                 | -0.010 | 0.005  | 0.071 | 0.096 | 14    |
| PWY.7013.L.12.propanediol.degradation                                             | -0.013 | 0.007  | 0.072 | 0.097 | 29    |
| ARG.POLYAMINE.SYN.superpathway.of.arginine.and.polyamine.biosynthesis             | -0.016 | 0.009  | 0.072 | 0.097 | 61    |
| PWY.7199.pyrimidine.deoxyribonucleosides.salvage                                  | -0.005 | 0.003  | 0.074 | 0.099 | 98    |
| PWY.1501.mandelate.degradation.I                                                  | -0.006 | 0.003  | 0.075 | 0.100 | 10    |
| PWY.6630.superpathway.of.L.tyrosine.biosynthesis                                  | -0.013 | 0.007  | 0.075 | 0.100 | 48    |
| PWY.7210.pyrimidine.deoxyribonucleotides.biosynthesis.from.CTP                    | -0.017 | 0.009  | 0.075 | 0.100 | 53    |
| PWY4FS.8.phosphatidylglycerol.biosynthesis.II..non.plastidic.                     | -0.011 | 0.006  | 0.075 | 0.100 | 95    |
| POLYAMSYN.PWY.superpathway.of.polyamine.biosynthesis.I                            | -0.017 | 0.009  | 0.075 | 0.101 | 61    |
| PWY4FS.7.phosphatidylglycerol.biosynthesis.I..plastidic.                          | -0.011 | 0.006  | 0.079 | 0.104 | 95    |
| PWY.6305.putrescine.biosynthesis.IV                                               | -0.015 | 0.009  | 0.082 | 0.108 | 66    |
| LIPASYN.PWY.phospholipases                                                        | -0.017 | 0.010  | 0.083 | 0.109 | 19    |

| Pathway                                                                       | Coeff  | StdErr | p     | q     | N > 0 |
|-------------------------------------------------------------------------------|--------|--------|-------|-------|-------|
| GALLATE.DEGRADATION.II.PWY.gallate.degradation.I                              | -0.007 | 0.004  | 0.083 | 0.109 | 14    |
| PWY.6595.superpathway.of.guanosine.nucleotides.degradation..plants.           | -0.019 | 0.011  | 0.087 | 0.114 | 81    |
| PWY0.42.2.methylcitrate.cycle.I                                               | -0.013 | 0.008  | 0.089 | 0.117 | 38    |
| SALVADEHYPOX.PWY.adenosine.nucleotides.degradation.II                         | -0.015 | 0.009  | 0.089 | 0.117 | 60    |
| PWY.1269.CMP.3.deoxy.D.manno.octulosonate.biosynthesis.I                      | -0.017 | 0.010  | 0.093 | 0.121 | 76    |
| RUMP.PWY.formaldehyde.oxidation.I                                             | -0.005 | 0.003  | 0.094 | 0.122 | 59    |
| PWY.6113.superpathway.of.mycolate.biosynthesis                                | -0.004 | 0.003  | 0.095 | 0.124 | 10    |
| PWY0.1296.purine.ribonucleosides.degradation                                  | -0.005 | 0.003  | 0.097 | 0.125 | 98    |
| PWY.1861.formaldehyde.assimilation.II..RuMP.Cycle.                            | -0.009 | 0.005  | 0.103 | 0.133 | 73    |
| ALLANTOINDEG.PWY.superpathway.of.allantoin.degradation.in.yeast               | -0.014 | 0.008  | 0.104 | 0.134 | 34    |
| P105.PWY.TCA.cycle.IV..2.oxoglutarate.decarboxylase.                          | -0.015 | 0.009  | 0.108 | 0.140 | 35    |
| GLUDEG.I.PWY.GABA.shunt                                                       | -0.013 | 0.008  | 0.111 | 0.143 | 23    |
| PWY.6353.purine.nucleotides.degradation.II..aerobic.                          | -0.014 | 0.009  | 0.119 | 0.152 | 60    |
| PWY.5675.nitrate.reduction.V..assimilatory.                                   | -0.014 | 0.009  | 0.121 | 0.155 | 58    |
| PWY.7165.L.ascorbate.biosynthesis.VI..engineered.pathway.                     | -0.008 | 0.005  | 0.127 | 0.163 | 17    |
| PWY.7295.L.arabinose.degradation.IV                                           | -0.007 | 0.004  | 0.134 | 0.171 | 14    |
| PWY.5138.unsaturated.even.numbered.fatty.acid.beta.oxidation                  | -0.015 | 0.010  | 0.138 | 0.174 | 71    |
| PWY.5654.2.amino.3.carboxymuconate.semialdehyde.degradation.to.2.oxopentenoat | -0.003 | 0.002  | 0.141 | 0.179 | 11    |
| PWY.6210.2.aminophenol.degradation                                            | -0.003 | 0.002  | 0.141 | 0.179 | 11    |
| P42.PWY.incomplete.reductive.TCA.cycle                                        | -0.018 | 0.013  | 0.146 | 0.185 | 52    |
| PWY.5180.toluene.degradation.I..aerobic...via.o.cresol.                       | -0.011 | 0.008  | 0.151 | 0.190 | 24    |
| PWY.5182.toluene.degradation.II..aerobic...via.4.methylcatechol.              | -0.011 | 0.008  | 0.151 | 0.190 | 24    |
| PWY.321.mycolate.biosynthesis                                                 | -0.008 | 0.006  | 0.158 | 0.198 | 20    |
| PWY.6901.superpathway.of.glucose.and.xylose.degradation                       | -0.014 | 0.010  | 0.165 | 0.205 | 42    |
| PWY.4702.phytate.degradation.I                                                | -0.014 | 0.010  | 0.168 | 0.208 | 65    |
| PWY.6876.isopropanol.biosynthesis                                             | -0.006 | 0.004  | 0.171 | 0.212 | 15    |
| PWY.5083.NAD.NADH.phosphorylation.and.dephosphorylation                       | -0.011 | 0.009  | 0.183 | 0.226 | 61    |
| PWY.561.superpathway.of.glyoxylate.cycle.and.fatty.acid.degradation           | -0.014 | 0.010  | 0.185 | 0.228 | 34    |
| PWY.5005.biotin.biosynthesis.II                                               | -0.005 | 0.004  | 0.204 | 0.250 | 60    |
| PWY0.1415.superpathway.of.heme.biosynthesis.from.uroporphyrinogen.III         | -0.011 | 0.009  | 0.205 | 0.251 | 29    |
| PWY.6731.starch.degradation.III                                               | -0.012 | 0.009  | 0.217 | 0.264 | 17    |
| PWY.5415.catechol.degradation.I..meta.cleavage.pathway.                       | -0.008 | 0.007  | 0.226 | 0.275 | 25    |
| PWY.7254.TCA.cycle.VII..acetate.producers.                                    | -0.015 | 0.013  | 0.243 | 0.294 | 39    |
| P122.PWY.heterolactic.fermentation                                            | -0.008 | 0.007  | 0.272 | 0.326 | 64    |
| PWY3DJ.35471.L.ascorbate.biosynthesis.IV                                      | -0.011 | 0.010  | 0.273 | 0.327 | 33    |
| PWY.5384.sucrose.degradation.IV..sucrose.phosphorylase.                       | -0.012 | 0.011  | 0.284 | 0.337 | 87    |
| PWY.5690.TCA.cycle.II..plants.and.fungi.                                      | -0.014 | 0.013  | 0.305 | 0.361 | 50    |
| GLUCARDEG.PWY.D.glucarate.degradation.I                                       | -0.011 | 0.011  | 0.328 | 0.385 | 28    |
| P161.PWY.acetylene.degradation                                                | -0.009 | 0.010  | 0.334 | 0.391 | 67    |
| PWY.6307.L.tryptophan.degradation.X..mammalian.via.tryptamine.                | -0.005 | 0.006  | 0.420 | 0.479 | 11    |
| PWY0.1061.superpathway.of.L.alanine.biosynthesis                              | -0.007 | 0.009  | 0.453 | 0.512 | 64    |
| TEICHOICACID.PWY.teichoic.acid..poly.glycerol..biosynthesis                   | -0.004 | 0.005  | 0.456 | 0.515 | 65    |
| ECASYN.PWY.enterobacterial.common.antigen.biosynthesis                        | 0.003  | 0.004  | 0.463 | 0.521 | 29    |
| RHAMCAT.PWY.L.rhamnose.degradation.I                                          | -0.005 | 0.007  | 0.466 | 0.524 | 24    |
| PWY.7431.aromatic.biogenic.amine.degradation..bacteria.                       | -0.005 | 0.007  | 0.483 | 0.541 | 12    |
| PWY.6313.serotonin.degradation                                                | -0.005 | 0.007  | 0.505 | 0.563 | 12    |
| PWY.6549.L.glutamine.biosynthesis.III                                         | -0.006 | 0.009  | 0.511 | 0.567 | 24    |
| REDCITCYC.TCA.cycle.VIII..helicobacter.                                       | -0.007 | 0.011  | 0.513 | 0.569 | 35    |
| PWY.5028.L.histidine.degradation.II                                           | -0.006 | 0.009  | 0.519 | 0.573 | 35    |
| P562.PWY.myo.inositol.degradation.I                                           | -0.006 | 0.009  | 0.530 | 0.585 | 22    |
| GALACTUROCAT.PWY.D.galacturonate.degradation.I                                | -0.006 | 0.009  | 0.532 | 0.586 | 16    |
| P621.PWY.nylon.6.oligomer.degradation                                         | -0.003 | 0.004  | 0.534 | 0.587 | 18    |
| FUCCAT.PWY.fucose.degradation                                                 | -0.005 | 0.008  | 0.544 | 0.596 | 17    |
| P23.PWY.reductive.TCA.cycle.I                                                 | -0.005 | 0.008  | 0.546 | 0.597 | 19    |
| PWY.6507.4.deoxy.L.threo.hex.4.enopyranuronate.degradation                    | -0.005 | 0.008  | 0.548 | 0.598 | 47    |
| PWY.621.sucrose.degradation.III..sucrose.invertase.                           | -0.005 | 0.008  | 0.555 | 0.605 | 88    |
| KDO.NAGLIPASYN.PWY.superpathway.of..Kdo.2.lipid.A.biosynthesis                | -0.003 | 0.006  | 0.567 | 0.616 | 20    |
| FERMENTATION.PWY.mixed.acid.fermentation                                      | -0.005 | 0.010  | 0.586 | 0.635 | 51    |
| GALACTARDEG.PWY.D.galactarate.degradation.I                                   | -0.006 | 0.010  | 0.594 | 0.640 | 19    |
| GLUCARGALACTSUPER.PWY.superpathway.of.D.glucarate.and.D.galactarate.degr      | -0.006 | 0.010  | 0.594 | 0.640 | 19    |
| ENTBACSYN.PWY.enterobactin.biosynthesis                                       | 0.004  | 0.008  | 0.613 | 0.657 | 39    |

| Pathway                                                                          | Coeff  | StdErr | p     | q     | N > 0 |
|----------------------------------------------------------------------------------|--------|--------|-------|-------|-------|
| PWY.6531.mannitol.cycle                                                          | -0.004 | 0.009  | 0.628 | 0.670 | 34    |
| PWY.5505.L.glutamate.and.L.glutamine.biosynthesis                                | 0.003  | 0.007  | 0.637 | 0.676 | 18    |
| PWY.5860.superpathway.of.demethylmenaquinol.6.biosynthesis.I                     | 0.002  | 0.005  | 0.676 | 0.713 | 30    |
| X3.HYDROXYPHENYLACETATE.DEGRADATION.PWY.4.hydroxyphenylacetate.degr              | 0.001  | 0.003  | 0.701 | 0.734 | 16    |
| PWY.6803.phosphatidylcholine.acyl.editing                                        | -0.004 | 0.011  | 0.706 | 0.738 | 49    |
| PWY.5850.superpathway.of.menaquinol.6.biosynthesis.I                             | 0.002  | 0.005  | 0.736 | 0.764 | 30    |
| PWY.5896.superpathway.of.menaquinol.10.biosynthesis                              | 0.002  | 0.005  | 0.736 | 0.764 | 30    |
| PWY.5862.superpathway.of.demethylmenaquinol.9.biosynthesis                       | 0.002  | 0.005  | 0.752 | 0.780 | 31    |
| PWY.5464.superpathway.of.cytosolic.glycolysis.plants.pyruvate.dehydrogenase.and. | -0.002 | 0.007  | 0.783 | 0.809 | 11    |
| THREOCAT.PWY.superpathway.of.L.threonine.metabolism                              | 0.001  | 0.002  | 0.790 | 0.814 | 13    |
| GLUCUROCAT.PWY.superpathway.of.beta.D.glucuronide.and.D.glucuronate.degrad:      | -0.002 | 0.007  | 0.800 | 0.824 | 28    |
| PWY0.1277.3.phenylpropanoate.and.3.3.hydroxyphenyl.propanoate.degradation        | 0.001  | 0.002  | 0.810 | 0.831 | 13    |
| HCAMHPDEG.PWY.3.phenylpropanoate.and.3.3.hydroxyphenyl.propanoate.degrada        | 0.001  | 0.002  | 0.811 | 0.831 | 13    |
| PWY.6690.cinnamate.and.3.hydroxycinnamate.degradation.to.2.oxopent.4.enoate      | 0.001  | 0.002  | 0.811 | 0.831 | 13    |
| PWY.5845.superpathway.of.menaquinol.9.biosynthesis                               | 0.001  | 0.005  | 0.824 | 0.844 | 31    |
| PWY.1541.superpathway.of.taurine.degradation                                     | 0.000  | 0.002  | 0.848 | 0.866 | 13    |
| PWY.7242.D.fructuronate.degradation                                              | 0.002  | 0.009  | 0.855 | 0.868 | 48    |
| ORNDEG.PWY.superpathway.of.ornithine.degradation                                 | 0.002  | 0.009  | 0.855 | 0.868 | 32    |
| ILEUDEG.PWY.L.isoleucine.degradation.I                                           | -0.001 | 0.006  | 0.880 | 0.893 | 13    |
| PWY.7315.dTDP.N.acetylthomosamine.biosynthesis                                   | 0.001  | 0.010  | 0.921 | 0.932 | 31    |
| PWY5F9.12.biphenyl.degradation                                                   | 0.000  | 0.002  | 0.923 | 0.933 | 18    |
| PWY.722.nicotinate.degradation.I                                                 | 0.001  | 0.005  | 0.924 | 0.933 | 18    |
| ARGDEG.PWY.superpathway.of.L.arginine.putrescine.and.4.aminobutanoate.degrad:    | 0.000  | 0.006  | 0.945 | 0.949 | 31    |
| ORNARGDEG.PWY.superpathway.of.L.arginine.and.L.ornithine.degradation             | 0.000  | 0.006  | 0.945 | 0.949 | 31    |
| PWY.5022.4.aminobutanoate.degradation.V                                          | -0.001 | 0.015  | 0.966 | 0.968 | 69    |
| GLYCOL.GLYOXDEG.PWY.superpathway.of.glycol.metabolism.and.degradation            | 0.000  | 0.006  | 0.971 | 0.972 | 14    |
| FUC.RHAMCAT.PWY.superpathway.of.fucose.and.rhamnose.degradation                  | 0.000  | 0.007  | 0.997 | 0.997 | 14    |
