# Supplementary material for: Supplemental Oxygen Alters the Airway Microbiome in Cystic Fibrosis
Source: PubMed Central journal article supplement (PMC9601246; doi:10.1128/msystems.00364-22), 2022-08-24
Supplement: msystems.00364-22-s0003.pdf [file msystems.00364-22-s0003.pdf]

| Pathway                                                                            | Coeff    | StdErr   | p        | q        | N > 0 |
|------------------------------------------------------------------------------------|----------|----------|----------|----------|-------|
| ANAEROFRUCAT.PWY;homolactic.fermentation                                           | -0.01903 | 0.004978 | 0.00025  | 0.000833 | 96    |
| ANAGLYCOLYSIS.PWY;glycolysis.III.(from.glucose)                                    | -0.00805 | 0.00283  | 0.00559  | 0.010908 | 98    |
| DENITRIFICATION.PWY;nitrate.reduction.I.(denitrification)                          | -0.02648 | 0.006612 | 0.000132 | 0.000503 | 55    |
| ECASYN.PWY;enterobacterial.common.antigen.biosynthesis                             | 0.002835 | 0.003844 | 0.462857 | 0.544537 | 29    |
| ENTBACSYN.PWY;enterobactin.biosynthesis                                            | 0.004098 | 0.008062 | 0.612551 | 0.655153 | 39    |
| FERMENTATION.PWY;mixed.acid.fermentation                                           | -0.00546 | 0.009979 | 0.585536 | 0.649024 | 51    |
| GLYCOCAT.PWY;glycogen.degradation.I.(bacterial)                                    | -0.0442  | 0.008512 | 1.40E-06 | 1.87E-05 | 84    |
| GLYCOLYSIS.E.D;superpathway.of.glycolysis.and.Entner.Doudoroff                     | -0.02948 | 0.008234 | 0.00057  | 0.00162  | 88    |
| GLYOXYLATE.BYPASS;glyoxylate.cycle                                                 | -0.03542 | 0.012401 | 0.005385 | 0.010769 | 63    |
| HEME.BIOSYNTHESIS.II;heme.biosynthesis.I.(aerobic)                                 | -0.02488 | 0.005494 | 1.93E-05 | 0.00011  | 97    |
| HEMESYN2.PWY;heme.biosynthesis.II.(anaerobic)                                      | -0.0182  | 0.008681 | 0.038988 | 0.05885  | 35    |
| NAD.BIOSYNTHESIS.II;NAD.salvage.pathway.II                                         | -0.03478 | 0.009625 | 0.000511 | 0.001515 | 85    |
| NADSYN.PWY;NAD.biosynthesis.II.(from.tryptophan)                                   | -0.02314 | 0.00787  | 0.004216 | 0.009117 | 25    |
| P105.PWY;TCA.cycle.IV.(2.oxoglutarate.decarboxylase)                               | -0.0147  | 0.009059 | 0.108346 | 0.14691  | 35    |
| P122.PWY;heterolactic.fermentation                                                 | -0.00827 | 0.007481 | 0.272082 | 0.3455   | 64    |
| P161.PWY;acetylene.degradation                                                     | -0.00928 | 0.00956  | 0.334203 | 0.417754 | 67    |
| P23.PWY;reductive.TCA.cycle.I                                                      | -0.00478 | 0.007878 | 0.545785 | 0.623754 | 19    |
| P441.PWY;superpathway.of.N.acetylneuraminate.degradation                           | -0.02934 | 0.011612 | 0.013378 | 0.023267 | 75    |
| PPGPPMET.PWY;ppGpp.biosynthesis                                                    | -0.02616 | 0.007483 | 0.000751 | 0.001826 | 74    |
| PWY.1861;formaldehyde.assimilation.II.(RuMP.Cycle)                                 | -0.00882 | 0.005354 | 0.103062 | 0.142155 | 73    |
| PWY.5367;petroselinic.acid.biosynthesis                                            | -0.03985 | 0.009823 | 0.00011  | 0.000439 | 65    |
| PWY.5392;reductive.TCA.cycle.II                                                    | 0.002293 | 0.005141 | 0.656698 | 0.691261 | 10    |
| PWY.5837;14.dihydroxy.2.naphthoate.biosynthesis.I                                  | -0.00957 | 0.004675 | 0.043733 | 0.064789 | 81    |
| PWY.5897;superpathway.of.menaquinol.11.biosynthesis                                | -0.01108 | 0.005011 | 0.029695 | 0.04658  | 81    |
| PWY.6113;superpathway.of.mycolate.biosynthesis                                     | -0.00431 | 0.002559 | 0.095495 | 0.135473 | 10    |
| PWY.6123;inosine.5.phosphate.biosynthesis.I                                        | -0.00944 | 0.002802 | 0.001134 | 0.002591 | 98    |
| PWY.6185;4.methylcatechol.degradation.(ortho.cleavage)                             | -0.0243  | 0.009912 | 0.016293 | 0.027155 | 65    |
| PWY.6210;2.aminophenol.degradation                                                 | -0.00325 | 0.00219  | 0.141412 | 0.188549 | 11    |
| PWY.6700;queuosine.biosynthesis                                                    | -0.0106  | 0.003031 | 0.000753 | 0.001826 | 98    |
| PWY.6837;fatty.acid.beta.oxidation.V.(unsaturated.odd.number.di.isomerase.depends) | -0.01566 | 0.008204 | 0.05969  | 0.086822 | 58    |
| PWY.7117;C4.photosynthetic.carbon.assimilation.cycle.PEPCK.type                    | -0.02692 | 0.007586 | 0.000635 | 0.001638 | 94    |
| PWY.722;nicotinate.degradation.I                                                   | 0.000509 | 0.005307 | 0.92376  | 0.935453 | 18    |
| PWY.841;superpathway.of.purine.nucleotides.de.novo.biosynthesis.I                  | -0.01652 | 0.003762 | 3.22E-05 | 0.000171 | 98    |
| PWY.922;mevalonate.pathway.I                                                       | -0.02799 | 0.00786  | 0.000608 | 0.001622 | 91    |
| PWY0.1296;purine.ribonucleosides.degradation                                       | -0.00491 | 0.002919 | 0.096524 | 0.135473 | 98    |
| PWY66.400;glycolysis.VI.(metazoan)                                                 | -0.00774 | 0.002911 | 0.009387 | 0.016689 | 98    |
| PYRIDNUCSAL.PWY;NAD.salvage.pathway.I                                              | -0.03856 | 0.007304 | 9.78E-07 | 1.87E-05 | 66    |
| PYRIDNUCSYN.PWY;NAD.biosynthesis.I.(from.aspartate)                                | -0.0274  | 0.009365 | 0.004409 | 0.009281 | 76    |
| TCA.GLYOX.BYPASS;superpathway.of.glyoxylate.bypass.and.TCA                         | -0.03276 | 0.011877 | 0.007108 | 0.012923 | 63    |
| UBISYN.PWY;superpathway.of.ubiquinol.8.biosynthesis.(prokaryotic)                  | -0.02557 | 0.011496 | 0.028777 | 0.046043 | 43    |
