# Supplementary material for: Supplemental Oxygen Alters the Airway Microbiome in Cystic Fibrosis
Source: PubMed Central journal article supplement (PMC9601246; doi:10.1128/msystems.00364-22), 2022-08-24
Supplement: msystems.00364-22-s0004.pdf [file msystems.00364-22-s0004.pdf]

| Category              | Pathway                                                             | Incl | Prev | Criteria                                           |
|-----------------------|---------------------------------------------------------------------|------|------|----------------------------------------------------|
| Breakdown.Sugar       | ANAGLYCOLYSIS.PWY;glycolysis.III.(from.glucose)                     | T    | 98   | Central metabolism sugar breakdown.                |
| Breakdown.Sugar       | GLYCOLYSIS.E.D.;superpathway.of.glycolysis.and.Entner.Doudoroff     | T    | 98   | Central metabolism sugar breakdown.                |
| Fermentation          | PWY.5392;reductive.TCA.cycle.II                                     | T    | 98   | Oxygen-influenced pathway.                         |
| Synthesis.Protein     | HEME.BIOSYNTHESIS.II;heme.biosynthesis.I.(aerobic)                  | T    | 97   | Oxygen-related pathway.                            |
| Fermentation          | ANAEROFrucAT.PWY;homolactic.fermentation                            | T    | 96   | Fermentation reaction.                             |
| Breakdown.Sugar       | PWY.5837;14.dihydroxy.2.naphthoate.biosynthesis.I                   | T    | 96   | Central metabolism sugar breakdown.                |
| Synthesis.Lipid       | PWY66.400;glycolysis.VI.(metazoan)                                  | T    | 92   | Oxygen influenced pathway.                         |
| Synthesis.Protein     | PWY.6210;2.aminophenol.degradation                                  | T    | 88   | Oxygen carrier protein.                            |
| Breakdown.Carrier     | NAD.BIOSYNTHESIS.II;NAD.salvage.pathway.II                          | T    | 85   | Electron transport carrier.                        |
| Breakdown.Sugar       | GLYCOCAT.PWY;glycogen.degradation.I.(bacterial)                     | T    | 84   | Central metabolism sugar breakdown.                |
| Fermentation          | P441.PWY;superpathway.of.N.acetylneuraminate.degradation            | T    | 81   | Fermentation reaction.                             |
| Synthesis.Carrier     | PWY.6113;superpathway.of.mycolate.biosynthesis                      | T    | 81   | Electron transport carrier.                        |
| Synthesis.Carrier     | PWY.6145;superpathway.of.sialic.acids.and.CMP.sialic.acids.biosyntI | T    | 81   | Electron transport carrier.                        |
| Respiration           | PWY.6185;4.methylcatechol.degradation.(ortho.cleavage)              | T    | 77   | Respiration reaction.                              |
| Synthesis.Carrier     | PWY.6123;inosine.5.phosphate.biosynthesis.I                         | T    | 76   | Electron transport carrier.                        |
| Synthesis.Carrier     | PYRIDNUCSYN.PWY;NAD.biosynthesis.I.(from.aspartate)                 | T    | 76   | Electron transport carrier.                        |
| Signaling.Stress      | PPGPPMET.PWY;ppGpp.biosynthesis                                     | T    | 74   | Stress-signaling activity.                         |
| Respiration           | TCA.GLYOX.BYPASS;superpathway.of.glyoxylate.bypass.and.TCA          | T    | 71   | Respiration reaction.                              |
| Fermentation          | P161.PWY;acetylene.degradation                                      | T    | 67   | Fermentation reaction.                             |
| Synthesis.Carrier     | PYRIDNUCSAL.PWY;NAD.salvage.pathway.I                               | T    | 66   | Electron transport carrier.                        |
| Fermentation          | P122.PWY;heterolactic.fermentation                                  | T    | 64   | Fermentation reaction.                             |
| Breakdown.Sugar       | PWY0.1296;purine.ribonucleosides.degradation                        | T    | 64   | Oxygen influenced pathway.                         |
| Respiration           | GLYOXYLATE.BYPASS;glyoxylate.cycle                                  | T    | 63   | Respiration reaction.                              |
| Synthesis.Antigen     | PWY.841;superpathway.of.purine.nucleotides.de.novo.biosynthesis.I   | T    | 62   | Production of antigen compounds.                   |
| Synthesis.Antigen     | PWY.922;mevalonate.pathway.I                                        | T    | 62   | Production of antigen compounds.                   |
| Processing.Carrier    | PWY.5367;petroselinate.biosynthesis                                 | T    | 61   | Electron transport carrier.                        |
| Resistance.Antibiotic | PWY.1861;formaldehyde.assimilation.II.(RuMP.Cycle)                  | T    | 58   | Antibiotic resistance process.                     |
| Cycle.Nitrogen        | PWY.5897;superpathway.of.menaquinol.11.biosynthesis                 | T    | 58   | Oxygen influenced pathway.                         |
| Cycle.Nitrogen        | DENITRIFICATION.PWY;nitrate.reduction.I.(denitrification)           | T    | 55   | Oxygen influenced pathway.                         |
| Fermentation          | PWY.6837;fatty.acid.beta.oxidation.V.(unsaturated.odd.number.di.isc | T    | 54   | Fermentation reaction.                             |
| Fermentation          | FERMENTATION.PWY;mixed.acid.fermentation                            | T    | 51   | Fermentation reaction.                             |
| Respiration           | PWY.722;nicotinate.degradation.I                                    | T    | 51   | Respiration reaction.                              |
| Synthesis.Antibiotic  | PWY.7053;docosahexaenoate.biosynthesis.I.(lower.eukaryotes)         | T    | 48   | Antibiotic production process.                     |
| Synthesis.Carrier     | UBISYN.PWY;superpathway.of.ubiquinol.8.biosynthesis.(prokaryotic)   | T    | 43   | Electron transport carrier.                        |
| Synthesis.Cofactor    | ENTBACSYN.PWY;enterobactin.biosynthesis                             | T    | 39   | Oxygen influenced pathway.                         |
| Cycle.Nitrogen        | PWY.7117;C4.photosynthetic.carbon.assimilation.cycle.PEPCK.type     | T    | 36   | Oxygen influenced pathway.                         |
| Synthesis.Protein     | HEMESYN2.PWY;heme.biosynthesis.II.(anaerobic)                       | T    | 35   | Oxygen carrier protein.                            |
| Respiration           | P105.PWY;TCA.cycle.IV.(2.oxoglutarate.decarboxylase)                | T    | 35   | Respiration reaction.                              |
| Synthesis.Antigen     | ECASYN.PWY;enterobacterial.common.antigen.biosynthesis              | T    | 29   | Production of antigen compounds.                   |
| Synthesis.Carrier     | NADSYN.PWY;NAD.biosynthesis.II.(from.tryptophan)                    | T    | 25   | Electron transport carrier.                        |
| Signaling.Stress      | PWY.7255;ergothioneine.biosynthesis.I.(bacteria)                    | T    | 25   | Stress-signaling activity.                         |
| Resistance.Antibiotic | PWY.6700;queuosine.biosynthesis                                     | T    | 21   | Antibiotic resistance process.                     |
| Respiration           | P23.PWY;reductive.TCA.cycle.I                                       | T    | 19   | Respiration reaction.                              |
| Synthesis.Vitamin     | 1CMET2.PWY;N10.formyl.tetrahydrofolate.biosynthesis                 | F    | 98   | No chemical or reaction of interest.               |
| Synthesis.Amino       | ARGSYN.PWY;L.arginine.biosynthesis.I.(via.L.ornithine)              | F    | 98   | No chemical or reaction of interest.               |
| Synthesis.Amino       | ARO.PWY;chorismate.biosynthesis.I                                   | F    | 98   | No chemical or reaction of interest.               |
| Synthesis.Amino       | BRANCHED.CHAIN.AA.SYN.PWY;superpathway.of.branched.amino.           | F    | 98   | No chemical or reaction of interest.               |
| Synthesis.CoA         | COA.PWY.1;coenzyme.A.biosynthesis.II.(mammalian)                    | F    | 98   | No chemical or reaction of interest.               |
| Metabolism.Central    | COA.PWY;coenzyme.A.biosynthesis.I                                   | F    | 98   | Human-associated pathway.                          |
| Synthesis.Amino       | COMPLETE.ARO.PWY;superpathway.of.aromatic.amino.acid.biosynI        | F    | 98   | No chemical or reaction of interest.               |
| Synthesis.Nucleic     | DENOVOPURINE2.PWY;superpathway.of.purine.nucleotides.de.nov         | F    | 98   | No chemical or reaction of interest.               |
| Breakdown.Amino       | HISDEG.PWY;L.histidine.degradation.I                                | F    | 98   | No chemical or reaction of interest.               |
| Synthesis.Amino       | HISTSYN.PWY;L.histidine.biosynthesis                                | F    | 98   | No chemical or reaction of interest.               |
| Synthesis.Amino       | HOMOSER.METSYN.PWY;L.methionine.biosynthesis.I                      | F    | 98   | No chemical or reaction of interest.               |
| Synthesis.Amino       | ILEUSYN.PWY;L.isoleucine.biosynthesis.I.(from.threonine)            | F    | 98   | No chemical or reaction of interest.               |
| Synthesis.Amino       | METHYLGALLATE.DEGRADATION.PWY;methylgallate.degradation             | F    | 98   | No chemical or reaction of interest.               |
| Synthesis.Amino       | METSYN.PWY;L.homoserine.and.L.methionine.biosynthesis               | F    | 98   | No chemical or reaction of interest.               |
| Breakdown.Sugar       | NONOXIPENT.PWY;pentose.phosphate.pathway.(non.oxidative.bran        | F    | 98   | No chemical or reaction of interest.               |
| Synthesis.Vitamin     | PANTO.PWY;phosphopantothenate.biosynthesis.I                        | F    | 98   | No chemical or reaction of interest.               |
| Synthesis.Structural  | PEPTIDOGLYCANSYN.PWY;peptidoglycan.biosynthesis.I.(meso.diaI        | F    | 98   | No chemical or reaction of interest.               |
| Breakdown.Nucleic     | PWY.1501;mandelate.degradation.I                                    | F    | 98   | No chemical or reaction of interest.               |
| Synthesis.Lipid       | PWY.181;photorespiration                                            | F    | 98   | No chemical or reaction of interest.               |
| Synthesis.Structural  | PWY.241;C4.photosynthetic.carbon.assimilation.cycle.NADP.ME.type    | F    | 98   | No chemical or reaction of interest.               |
| Synthesis.Nucleic     | PWY.2941;L.lysine.biosynthesis.II                                   | F    | 98   | No chemical or reaction of interest.               |
| Breakdown.Sugar       | PWY.3941;beta.alanine.biosynthesis.II                               | F    | 98   | Plant-specific central metabolism sugar breakdown. |
| Synthesis.Amino       | PWY.5044;purine.nucleotides.degradation.I.(plants)                  | F    | 98   | No chemical or reaction of interest.               |
| Synthesis.Amino       | PWY.5055;nicotinate.degradation.III                                 | F    | 98   | No chemical or reaction of interest.               |
| Synthesis.Vitamin     | PWY.5088;L.glutamate.degradation.VIII.(to.propanoate)               | F    | 98   | No chemical or reaction of interest.               |
| Synthesis.Cofactor    | PWY.5136;fatty.acid.beta.oxidation.II.(peroxisome)                  | F    | 98   | No chemical or reaction of interest.               |
| Synthesis.Amino       | PWY.5178;toluene.degradation.IV.(aerobic).(via.catechol)            | F    | 98   | No chemical or reaction of interest.               |
| Synthesis.Amino       | PWY.5417;catechol.degradation.III.(ortho.cleavage.pathway)          | F    | 98   | No chemical or reaction of interest.               |
| Synthesis.Amino       | PWY.5419;catechol.degradation.to.2.oxopent.4.enoate.II              | F    | 98   | No chemical or reaction of interest.               |

| Category               | Pathway                                                             | Incl | Prev Criteria                                    |
|------------------------|---------------------------------------------------------------------|------|--------------------------------------------------|
| Synthesis.CoA          | PWY.5508;adenosylcobalamin.biosynthesis.from.cobyrrinate.ac.diami   | F    | 98 No chemical or reaction of interest.          |
| Synthesis.Amino        | PWY.5686;UMP.biosynthesis                                           | F    | 98 No chemical or reaction of interest.          |
| Synthesis.Lipid        | PWY.5896;superpathway.of.menaquinol.10.biosynthesis                 | F    | 98 No chemical or reaction of interest.          |
| Synthesis.Nucleic      | PWY.5910;superpathway.of.geranylgeranyldiphosphate.biosynthesis     | F    | 98 No chemical or reaction of interest.          |
| Breakdown.Nucleic      | PWY.5920;superpathway.of.heme.biosynthesis.from.glycine             | F    | 98 No chemical or reaction of interest.          |
| Synthesis.Nucleic      | PWY.6309;L.tryptophan.degradation.XI.(mammalian.via.kynurenine)     | F    | 98 No chemical or reaction of interest.          |
| Synthesis.Nucleic      | PWY.6313;serotonin.degradation                                      | F    | 98 No chemical or reaction of interest.          |
| Synthesis.Nucleic      | PWY.6317;galactose.degradation.I.(Leloir.pathway)                   | F    | 98 No chemical or reaction of interest.          |
| Synthesis.Nucleic      | PWY.6318;L.phenylalanine.degradation.IV.(mammalian.via.side.chair   | F    | 98 No chemical or reaction of interest.          |
| Synthesis.Nucleic      | PWY.6338;superpathway.of.vanillin.and.vanillate.degradation         | F    | 98 No chemical or reaction of interest.          |
| Synthesis.Nucleic      | PWY.6339;syringate.degradation                                      | F    | 98 No chemical or reaction of interest.          |
| Cycle.SAM              | PWY.6383;mono.trans.poly.cis.deciprenyl.phosphate.biosynthesis      | F    | 98 No chemical or reaction of interest.          |
| Synthesis.Chemical     | PWY.6385;peptidoglycan.biosynthesis.III.(mycobacteria)              | F    | 98 No chemical or reaction of interest.          |
| Synthesis.Nucleic      | PWY.6507;4.deoxy.L.threo.hex.4.enopyruronate.degradation            | F    | 98 No chemical or reaction of interest.          |
| Synthesis.Structural   | PWY.6629;superpathway.of.L.tryptophan.biosynthesis                  | F    | 98 No chemical or reaction of interest.          |
| Synthesis.Structural   | PWY.6630;superpathway.of.L.tyrosine.biosynthesis                    | F    | 98 No chemical or reaction of interest.          |
| Synthesis.Structural   | PWY.6632;caffeine.degradation.IV.(bacteria.via.demethylation.and.o) | F    | 98 No chemical or reaction of interest.          |
| Breakdown.Nucleic      | PWY.6901;superpathway.of.glucose.and.xylose.degradation             | F    | 98 No chemical or reaction of interest.          |
| Breakdown.Sugar        | PWY.7013;L.12.propanediol.degradation                               | F    | 98 Human-associated pathway.                     |
| Synthesis.Nucleic      | PWY.7090;UDP.23.diacetamido.23.dideoxy.alpha.D.mannuronate.bic      | F    | 98 No chemical or reaction of interest.          |
| Synthesis.Nucleic      | PWY.7094;fatty.acid.salvage                                         | F    | 98 No chemical or reaction of interest.          |
| Synthesis.Amino        | PWY.7219;adenosine.ribonucleotides.de.novo.biosynthesis             | F    | 98 No chemical or reaction of interest.          |
| Engineered             | PWY.7295;L.arabinose.degradation.IV                                 | F    | 98 Artificially engineered pathway.              |
| Synthesis.Nucleic      | PWY.7337;10.cis.heptadecenoyl.CoA.degradation.(yeast)               | F    | 98 No chemical or reaction of interest.          |
| Synthesis.Nucleic      | PWY.7338;10.trans.heptadecenoyl.CoA.degradation.(reductase.depe     | F    | 98 No chemical or reaction of interest.          |
| Breakdown.Nucleic      | PWY.7345;superpathway.of.anaerobic.sucrose.degradation              | F    | 98 No chemical or reaction of interest.          |
| Breakdown.Nucleic      | PWY.7357;thiamin.formation.from.pyrithiamine.and.oxythiamine.(yea   | F    | 98 No chemical or reaction of interest.          |
| Breakdown.Nucleic      | PWY.7374;14.dihydroxy.6.naphthoate.biosynthesis.I                   | F    | 98 No chemical or reaction of interest.          |
| Synthesis.Nucleic      | PWY.7385;13.propanediol.biosynthesis.(engineered)                   | F    | 98 No chemical or reaction of interest.          |
| Synthesis.Nucleic      | PWY.7389;superpathway.of.anaerobic.energy.metabolism.(invertebr     | F    | 98 No chemical or reaction of interest.          |
| Synthesis.Nucleic      | PWY.7391;isoprene.biosynthesis.II.(engineered)                      | F    | 98 No chemical or reaction of interest.          |
| Synthesis.Nucleic      | PWY.7392;taxadiene.biosynthesis.(engineered)                        | F    | 98 No chemical or reaction of interest.          |
| Synthesis.Nucleic      | PWY.7397;naringenin.biosynthesis.(engineered)                       | F    | 98 No chemical or reaction of interest.          |
| Synthesis.Nucleic      | PWY.7399;methylphosphonate.degradation.II                           | F    | 98 No chemical or reaction of interest.          |
| Synthesis.Nucleic      | PWY.7400;L.arginine.biosynthesis.IV.(archaeobacteria)               | F    | 98 No chemical or reaction of interest.          |
| Synthesis.Nucleic      | PWY66.422;D.galactose.degradation.V.(Leloir.pathway)                | F    | 98 No chemical or reaction of interest.          |
| Synthesis.Amino        | SER.GLYSYN.PWY;superpathway.of.L.serine.and.glycine.biosynthes      | F    | 98 No chemical or reaction of interest.          |
| Synthesis.Vitamin      | THISYN.PWY;superpathway.of.thiamin.diphosphate.biosynthesis.I       | F    | 98 No chemical or reaction of interest.          |
| Synthesis.Amino        | THRESYN.PWY;superpathway.of.L.threonine.biosynthesis                | F    | 98 No chemical or reaction of interest.          |
| Nucleic.Processing     | TRNA.CHARGING.PWY;tRNA.charging                                     | F    | 98 No chemical or reaction of interest.          |
| Synthesis.Amino        | TRPSYN.PWY;L.tryptophan.biosynthesis                                | F    | 98 No chemical or reaction of interest.          |
| Synthesis.Nucleic      | UDPNAGSYN.PWY;UDP.N.acetyl.D.glucosamine.biosynthesis.I             | F    | 98 No chemical or reaction of interest.          |
| Synthesis.Amino        | VALSYN.PWY;L.valine.biosynthesis                                    | F    | 98 No chemical or reaction of interest.          |
| Synthesis.Amino        | ARGSYNSUB.PWY;L.arginine.biosynthesis.II.(acetyl.cycle)             | F    | 97 No chemical or reaction of interest.          |
| Synthesis.Amino        | GLUTORN.PWY;L.ornithine.biosynthesis                                | F    | 97 No chemical or reaction of interest.          |
| Synthesis.Amino        | HSERMETANA.PWY;L.methionine.biosynthesis.III                        | F    | 97 No chemical or reaction of interest.          |
| Synthesis.Cofactor     | PANTOSYN.PWY;pantothenate.and.coenzyme.A.biosynthesis.I             | F    | 97 No chemical or reaction of interest.          |
| Breakdown.Sugar        | PENTOSE.P.PWY;pentose.phosphate.pathway                             | F    | 97 No chemical or reaction of interest.          |
| Synthesis.Chemical     | POLYISOPRENSYN.PWY;polyisoprenoid.biosynthesis.(E.coli)             | F    | 97 No chemical or reaction of interest.          |
| Synthesis.Amino        | PWY.5030;L.histidine.degradation.III                                | F    | 97 No chemical or reaction of interest.          |
| Synthesis.Vitamin      | PWY.6352;3.phosphoinositide.biosynthesis                            | F    | 97 No chemical or reaction of interest.          |
| Synthesis.Chemical     | PWY.7199;pyrimidine.deoxyribonucleosides.salvage                    | F    | 97 No chemical or reaction of interest.          |
| Synthesis.Vitamin      | PWY0.1298;superpathway.of.pyrimidine.deoxyribonucleosides.degr      | F    | 97 No chemical or reaction of interest.          |
| Synthesis.Nucleic      | DTDPRHAMSYN.PWY;dTDP.L.rhamnose.biosynthesis.I                      | F    | 96 No chemical or reaction of interest.          |
| Synthesis.Carbohydrate | GLYCOGENSYNTH.PWY;glycogen.biosynthesis.I.(from.ADP.D.Gluc          | F    | 96 No chemical or reaction of interest.          |
| Synthesis.Nucleic      | PWY.2723;trehalose.degradation.V                                    | F    | 96 No chemical or reaction of interest.          |
| Breakdown.Alcohol      | PWY.6992;15.anhydrofructose.degradation                             | F    | 96 No chemical or reaction of interest.          |
| Synthesis.Amino        | PWY0.881;superpathway.of.fatty.acid.biosynthesis.I.(E.coli)         | F    | 96 No chemical or reaction of interest.          |
| Synthesis.Vitamin      | PWY4LZ.257;superpathway.of.fermentation.(Chlamydomonas.reinhei      | F    | 96 No chemical or reaction of interest.          |
| Cycle.Carbon           | CALVIN.PWY;Calvin.Benson.Bassham.cycle                              | F    | 95 No chemical or reaction of interest.          |
| Synthesis.Lipid        | FASYN.INITIAL.PWY;superpathway.of.fatty.acid.biosynthesis.initiati  | F    | 95 No chemical or reaction of interest.          |
| Breakdown.Amino        | GLCMANNANAUT.PWY;superpathway.of.N.acetylglucosamine.N.ace          | F    | 95 No chemical or reaction of interest.          |
| Synthesis.Antigen      | OANTIGEN.PWY;O.antigen.building.blocks.biosynthesis.(E.coli)        | F    | 95 Narrow-scope production of antigen compounds. |
| Synthesis.Lipid        | PWY.5180;toluene.degradation.I.(aerobic).(via.o.cresol)             | F    | 95 No chemical or reaction of interest.          |
| Synthesis.Lipid        | PWY.5181;toluene.degradation.III.(aerobic).(via.p.cresol)           | F    | 95 No chemical or reaction of interest.          |
| Synthesis.Cofactor     | PWY.5651;L.tryptophan.degradation.to.2.amino.3.carboxymuconate.;    | F    | 95 No chemical or reaction of interest.          |
| Synthesis.Cofactor     | PWY.5654;2.amino.3.carboxymuconate.semialdehyde.degradation.tc      | F    | 95 No chemical or reaction of interest.          |
| Synthesis.Nucleic      | PWY.5873;ubiquinol.7.biosynthesis.(eukaryotic)                      | F    | 95 No chemical or reaction of interest.          |
| Synthesis.Structural   | PWY.6703;preQ0.biosynthesis                                         | F    | 95 No chemical or reaction of interest.          |
| Breakdown.Carbohydrate | PWY.7115;C4.photosynthetic.carbon.assimilation.cycle.NAD.ME.type    | F    | 95 No chemical or reaction of interest.          |
| Breakdown.Vitamin      | PWY.7210;pyrimidine.deoxyribonucleotides.biosynthesis.from.CTP      | F    | 95 No chemical or reaction of interest.          |
| Synthesis.Lipid        | PWY0.321;phenylacetate.degradation.I.(aerobic)                      | F    | 95 No chemical or reaction of interest.          |

| Category               | Pathway                                                             | Incl | Prev Criteria                                                |
|------------------------|---------------------------------------------------------------------|------|--------------------------------------------------------------|
| Synthesis.Lipid        | PWY66.399;gluconeogenesis.III                                       | F    | 95 Excluded for legibility. Oxygen influenced pathway.       |
| Synthesis.Carrier      | PWY.6396;superpathway.of.23.butenediol.biosynthesis                 | F    | 94 Fungi-specific electron transport carrier.                |
| Cycle.Carbon           | PWY.7315;dTDP.N.acetylthomosamine.biosynthesis                      | F    | 94 Plant-specific oxygen influenced pathway.                 |
| Synthesis.Carrier      | RIBOSYN2.PWY;flavin.biosynthesis.I.(bacteria.and.plants)            | F    | 94 Excluded for legibility. Electron transport carrier.      |
| Synthesis.Amino        | ASPASN.PWY;superpathway.of.L.aspartate.and.L.asparagine.biosyn      | F    | 93 No chemical or reaction of interest.                      |
| Synthesis.Lipid        | FASYN.ELONG.PWY;fatty.acid.elongation.saturated                     | F    | 93 No chemical or reaction of interest.                      |
| Synthesis.Amino        | PWY.5505;L.glutamate.and.L.glutamine.biosynthesis                   | F    | 93 No chemical or reaction of interest.                      |
| Synthesis.Lipid        | PWY.6263;superpathway.of.menaquinol.8.biosynthesis.II               | F    | 93 No chemical or reaction of interest.                      |
| Fermentation           | P124.PWY;Bifidobacterium.shunt                                      | F    | 92 Narrow-scope Fermentation reaction.                       |
| Fermentation           | P125.PWY;superpathway.of.(RR).butenediol.biosynthesis               | F    | 92 Excluded for legibility. Fermentation reaction.           |
| Synthesis.Lipid        | PWY.3781;aerobic.respiration.I.(cytochrome.c)                       | F    | 92 Excluded for legibility. Oxygen influenced pathway.       |
| Synthesis.Amino        | PWY.5384;sucrose.degradation.IV.(sucrose.phosphorylase)             | F    | 92 No chemical or reaction of interest.                      |
| Synthesis.Lipid        | PWY.6269;adenosylcobalamin.salvage.from.cobinamide.II               | F    | 92 No chemical or reaction of interest.                      |
| Synthesis.Lipid        | PWY.6527;stachyose.degradation                                      | F    | 92 No chemical or reaction of interest.                      |
| Synthesis.Amino        | PWY.7420;monoacylglycerol.metabolism.(yeast)                        | F    | 92 No chemical or reaction of interest.                      |
| Breakdown.Alcohol      | HEXITOLDEGSUPER.PWY;superpathway.of.hexitol.degradation.(bar        | F    | 91 No chemical or reaction of interest.                      |
| Breakdown.Structural   | PWY.1269;CMP.3.deoxy.D.manno.octulosonate.biosynthesis.I            | F    | 91 No chemical or reaction of interest.                      |
| Breakdown.Nucleic      | PWY.1622;formaldehyde.assimilation.I.(serine.pathway)               | F    | 91 No chemical or reaction of interest.                      |
| Breakdown.Sugar        | PWY.7039;phosphatidate.metabolism.as.a.signaling.molecule           | F    | 91 No chemical or reaction of interest.                      |
| Synthesis.Nucleic      | PWY.7560;methylerythritol.phosphate.pathway.II                      | F    | 91 No chemical or reaction of interest.                      |
| Synthesis.Chemical     | PWY6666.2;dopamine.degradation                                      | F    | 91 No chemical or reaction of interest.                      |
| Synthesis.Vitamin      | FOLSYN.PWY;superpathway.of.tetrahydrofolate.biosynthesis.and.sal    | F    | 90 No chemical or reaction of interest.                      |
| Synthesis.Lipid        | PHOSLIPSYN.PWY;superpathway.of.phospholipid.biosynthesis.I.(bar     | F    | 90 No chemical or reaction of interest.                      |
| Respiration            | PWY.5081;L.tryptophan.degradation.VIII.(to.tryptophol)              | F    | 90 Eukaryote-associated respiration reaction.                |
| Synthesis.Chemical     | PWY.6182;superpathway.of.salicylate.degradation                     | F    | 90 No chemical or reaction of interest.                      |
| Synthesis.Vitamin      | PWY.6906;chitin.derivatives.degradation                             | F    | 90 No chemical or reaction of interest.                      |
| Synthesis.Amino        | DAPLYSINESYN.PWY;L.lysine.biosynthesis.I                            | F    | 89 No chemical or reaction of interest.                      |
| Breakdown.Sugar        | LACTOSECAT.PWY;lactose.and.galactose.degradation.I                  | F    | 89 No chemical or reaction of interest.                      |
| Breakdown.Nucleic      | PWY.1541;superpathway.of.taurine.degradation                        | F    | 89 No chemical or reaction of interest.                      |
| Breakdown.Lipid        | FAO.PWY;fatty.acid.beta.oxidation.I                                 | F    | 88 No chemical or reaction of interest.                      |
| Synthesis.Amino        | P461.PWY;hexitol.fermentation.to.lactate.formate.ethanol.and.acetat | F    | 88 No chemical or reaction of interest.                      |
| Breakdown.Sugar        | PWY.6467;Kdo.transfer.to.lipid.IVA.III.(Chlamydia)                  | F    | 88 No chemical or reaction of interest.                      |
| Synthesis.Amino        | CITRULBIO.PWY;L.citrulline.biosynthesis                             | F    | 87 No chemical or reaction of interest.                      |
| Breakdown.Carbohydrate | P221.PWY;octane.oxidation                                           | F    | 87 No chemical or reaction of interest.                      |
| Breakdown.Lipid        | PWY.5464;superpathway.of.cytosolic.glycolysis.(plants).pyruvate.deh | F    | 87 No chemical or reaction of interest.                      |
| Breakdown.Sugar        | PWY.5695;urate.biosynthesis.inosine.5.phosphate.degradation         | F    | 87 No chemical or reaction of interest.                      |
| Synthesis.Protein      | PWY.6215;4.chlorobenzoate.degradation                               | F    | 87 Excluded for legibility. Oxygen carrier protein.          |
| Respiration            | PWY.7546;diphthamide.biosynthesis.(eukaryotes)                      | F    | 87 Yeast-specific respiration reaction.                      |
| Synthesis.Sugar        | GLUCONEO.PWY;gluconeogenesis.I                                      | F    | 86 No chemical or reaction of interest.                      |
| Cycle.Nitrogen         | PWY.5179;toluene.degradation.V.(aerobic).(via.toluene.cis.diol)     | F    | 86 No chemical or reaction of interest.                      |
| Breakdown.Nucleic      | PWY.7031;protein.N.glycosylation.(bacterial)                        | F    | 86 No chemical or reaction of interest.                      |
| Breakdown.Sugar        | PWY.6588;pyruvate.fermentation.to.acetone                           | F    | 85 No chemical or reaction of interest.                      |
| Breakdown.Sugar        | GLUCOSE1PMETAB.PWY;glucose.and.glucose.1.phosphate.degrad           | F    | 84 No chemical or reaction of interest.                      |
| Cycle.ROS              | PWY.5109;2.methylbutanoate.biosynthesis                             | F    | 84 Excluded for legibility. Oxygen influenced pathway.       |
| Breakdown.Nucleic      | PWY.6897;thiamin.salvage.II                                         | F    | 83 No chemical or reaction of interest.                      |
| Synthesis.Vitamin      | PWY.3661;glycine.betaine.degradation.I                              | F    | 82 No chemical or reaction of interest.                      |
| Breakdown.Sugar        | PWY.5028;L.histidine.degradation.II                                 | F    | 82 No chemical or reaction of interest.                      |
| Breakdown.Nucleic      | PWY.6895;superpathway.of.thiamin.diphosphate.biosynthesis.II        | F    | 82 No chemical or reaction of interest.                      |
| Breakdown.Alcohol      | PWY.7411;superpathway.of.phosphatidate.biosynthesis.(yeast)         | F    | 82 No chemical or reaction of interest.                      |
| Synthesis.Vitamin      | PYRIDOXSYN.PWY;pyridoxal.5.phosphate.biosynthesis.I                 | F    | 82 No chemical or reaction of interest.                      |
| Synthesis.Amino        | ARGORNPROST.PWY;arginine.ornithine.and.proline.interconversion      | F    | 81 No chemical or reaction of interest.                      |
| Synthesis.Carrier      | PWY.6075;ergosterol.biosynthesis.I                                  | F    | 81 Plant-specific electron transport carrier.                |
| Synthesis.Carrier      | PWY.6098;diploterol.and.cycloartenol.biosynthesis                   | F    | 81 Excluded for legibility. Electron transport carrier.      |
| Synthesis.Carrier      | PWY.6167;flavin.biosynthesis.II.(archaea)                           | F    | 81 Excluded for legibility. Electron transport carrier.      |
| Synthesis.Carrier      | PWY.6168;flavin.biosynthesis.III.(fungi)                            | F    | 81 Excluded for legibility. Electron transport carrier.      |
| Synthesis.Carrier      | PWY.6174;mevalonate.pathway.II.(archaea)                            | F    | 81 Excluded for legibility. Electron transport carrier.      |
| Breakdown.Nucleic      | PWY.6876;isopropanol.biosynthesis                                   | F    | 81 No chemical or reaction of interest.                      |
| Synthesis.Chemical     | SO4ASSIM.PWY;sulfate.reduction.I.(assimilatory)                     | F    | 81 No chemical or reaction of interest.                      |
| Nucleic.Processing     | PWY.2201;folate.transformations.I                                   | F    | 80 No chemical or reaction of interest.                      |
| Synthesis.Amino        | SULFATE.CYS.PWY;superpathway.of.sulfate.assimilation.and.cystei     | F    | 80 No chemical or reaction of interest.                      |
| Synthesis.Amino        | ARGININE.SYN4.PWY;L.ornithine.de.novo.biosynthesis                  | F    | 79 No chemical or reaction of interest.                      |
| Synthesis.Antigen      | NAGLIPASYN.PWY;lipid.IVA.biosynthesis                               | F    | 79 Excluded for legibility. Production of antigen compounds. |
| Synthesis.Sugar        | PWY.5656;mannosylglycerate.biosynthesis.I                           | F    | 78 Narrow-scope central metabolism energy storage.           |
| Synthesis.Amino        | PWY.5677;succinate.fermentation.to.butanoate                        | F    | 78 No chemical or reaction of interest.                      |
| Synthesis.Amino        | PWY.3502;superpathway.of.NAD.biosynthesis.in.eukaryotes             | F    | 77 No chemical or reaction of interest.                      |
| Breakdown.Amino        | PWY.6590;superpathway.of.Clostridium.acetobutylicum.acidogenic.fe   | F    | 77 No chemical or reaction of interest.                      |
| Breakdown.Sugar        | PWY.6760;xylose.degradation.III                                     | F    | 77 No chemical or reaction of interest.                      |
| Synthesis.Nucleic      | PWY.7347;sucrose.biosynthesis.III                                   | F    | 77 No chemical or reaction of interest.                      |
| Synthesis.Cofactor     | BIOTIN.BIOSYNTHESIS.PWY;biotin.biosynthesis.I                       | F    | 76 No chemical or reaction of interest.                      |
| Synthesis.Nucleic      | PWY.4041;gamma.glutamyl.cycle                                       | F    | 76 No chemical or reaction of interest.                      |
| Synthesis.Carrier      | PWY.6124;inosine.5.phosphate.biosynthesis.II                        | F    | 76 Excluded for legibility. Electron transport carrier.      |
| Synthesis.Carrier      | PWY.6125;superpathway.of.guanosine.nucleotides.de.novo.biosynth     | F    | 76 Excluded for legibility. Electron transport carrier.      |

| Category               | Pathway                                                                | Incl | Prev Criteria                                                          |
|------------------------|------------------------------------------------------------------------|------|------------------------------------------------------------------------|
| Synthesis.Cofactor     | PWY.6749;CMP.legionamate.biosynthesis.I                                | F    | 76 <i>No chemical or reaction of interest.</i>                         |
| Synthesis.Carrier      | PWY.7097;vanillin.and.vanillate.degradation.I                          | F    | 76 <i>Excluded for legibility. Electron transport carrier.</i>         |
| Breakdown.Chemical     | P42.PWY;incomplete.reductive.TCA.cycle                                 | F    | 75 <i>No chemical or reaction of interest.</i>                         |
| Synthesis.Amino        | PWY.6944;androstenedione.degradation                                   | F    | 75 <i>No chemical or reaction of interest.</i>                         |
| Synthesis.Nucleic      | PWY.7383;anaerobic.energy.metabolism.(invertebrates.cytosol)           | F    | 74 <i>No chemical or reaction of interest.</i>                         |
| Cycle.RuMP             | PWY.4702;phytate.degradation.I                                         | F    | 73 <i>No chemical or reaction of interest.</i>                         |
| Breakdown.Lipid        | PWY.5484;glycolysis.II.(from.fructose.6.phosphate)                     | F    | 71 <i>No chemical or reaction of interest.</i>                         |
| Processing.Carrier     | PWY.7539;6.hydroxymethyl.dihydropterin.diphosphate.biosynthesis.II     | F    | 71 <i>Yeast-associated electron transport carrier.</i>                 |
| Synthesis.Amino        | PWY66.409;superpathway.of.purine.nucleotide.salvage                    | F    | 70 <i>No chemical or reaction of interest.</i>                         |
| Fermentation           | PWY.5189;tetrapyrrole.biosynthesis.II.(from.glycine)                   | F    | 69 <i>Excluded for legibility. Fermentation reaction.</i>              |
| Synthesis.Cofactor     | COBALSYN.PWY;adenosylcobalamin.salvage.from.cobinamide.I               | F    | 68 <i>No chemical or reaction of interest.</i>                         |
| Breakdown.Sugar        | KETOGLUCONMET.PWY;ketogluconate.metabolism                             | F    | 68 <i>No chemical or reaction of interest.</i>                         |
| Breakdown.Chemical     | CATECHOL.ORTHO.CLEAVAGE.PWY;catechol.degradation.to.beta.F             | F    | 67 <i>No chemical or reaction of interest.</i>                         |
| Breakdown.Amino        | AST.PWY;L.arginine.degradation.II.(AST.pathway)                        | F    | 66 <i>No chemical or reaction of interest.</i>                         |
| Breakdown.Chemical     | PWY.5724;superpathway.of.atrazine.degradation                          | F    | 66 <i>No chemical or reaction of interest.</i>                         |
| Breakdown.Chemical     | PWY.5754;4.hydroxybenzoate.biosynthesis.I.(eukaryotes)                 | F    | 66 <i>No chemical or reaction of interest.</i>                         |
| Synthesis.Amino        | PWY.6549;L.glutamine.biosynthesis.III                                  | F    | 66 <i>No chemical or reaction of interest.</i>                         |
| Breakdown.Chemical     | PROTOCATECHUATE.ORTHO.CLEAVAGE.PWY;protocatechuate.d                   | F    | 65 <i>No chemical or reaction of interest.</i>                         |
| Breakdown.Chemical     | PWY.5156;superpathway.of.fatty.acid.biosynthesis.II.(plant)            | F    | 65 <i>No chemical or reaction of interest.</i>                         |
| Synthesis.Lipid        | PWY.5690;TCA.cycle.II.(plants.and.fungi)                               | F    | 65 <i>No chemical or reaction of interest.</i>                         |
| Breakdown.Chemical     | PWY.6433;hydroxylated.fatty.acid.biosynthesis.(plants)                 | F    | 65 <i>No chemical or reaction of interest.</i>                         |
| Breakdown.Chemical     | PWY.6435;4.hydroxybenzoate.biosynthesis.V                              | F    | 65 <i>No chemical or reaction of interest.</i>                         |
| Processing.Carrier     | PWY.7528;L.methionine.salvage.cycle.I.(bacteria.and.plants)            | F    | 65 <i>Narrow-scope electron transport carrier.</i>                     |
| Synthesis.Structural   | TEICHOICACID.PWY;teichoic.acid.(poly.glycerol).biosynthesis            | F    | 65 <i>No chemical or reaction of interest.</i>                         |
| Breakdown.Chemical     | P185.PWY;formaldehyde.assimilation.III.(dihydroxyacetone.cycle)        | F    | 64 <i>No chemical or reaction of interest.</i>                         |
| Synthesis.Amino        | PWY.101;photosynthesis.light.reactions                                 | F    | 64 <i>No chemical or reaction of interest.</i>                         |
| Breakdown.Sugar        | PWY.5083;NAD.NADH.phosphorylation.and.dephosphorylation                | F    | 64 <i>No chemical or reaction of interest.</i>                         |
| Synthesis.Lipid        | PWY.622;starch.biosynthesis                                            | F    | 64 <i>No chemical or reaction of interest.</i>                         |
| Synthesis.Lipid        | PWY.6531;mannitol.cycle                                                | F    | 64 <i>No chemical or reaction of interest.</i>                         |
| Respiration            | GLYCOLYSIS;glycolysis.I.(from.glucose.6.phosphate)                     | F    | 63 <i>Excluded for legibility. Central metabolism and respiration.</i> |
| Bkreakdown.Amino       | PWY.5265;peptidoglycan.biosynthesis.II.(staphylococci)                 | F    | 63 <i>No chemical or reaction of interest.</i>                         |
| Respiration            | TCA;TCA.cycle.I.(prokaryotic)                                          | F    | 63 <i>Excluded for legibility. Respiration reaction.</i>               |
| Synthesis.Amino        | ARG+POLYAMINE.SYN;superpathway.of.arginine.and.polyamine.bio           | F    | 61 <i>No chemical or reaction of interest.</i>                         |
| Synthesis.Carbohydrate | COLANSYN.PWY;colanic.acid.building.blocks.biosynthesis                 | F    | 61 <i>No chemical or reaction of interest.</i>                         |
| Synthesis.Amino        | POLYAMSYN.PWY;superpathway.of.polyamine.biosynthesis.I                 | F    | 61 <i>No chemical or reaction of interest.</i>                         |
| Breakdown.Chemical     | PWY.5534;propylene.degradation                                         | F    | 61 <i>Excluded for legibility. Oxygen influenced pathway.</i>          |
| Synthesis.Chemical     | PWY0.42;2.methylcitrate.cycle.I                                        | F    | 61 <i>Artificially engineered pathway.</i>                             |
| Synthesis.Cofactor     | PWY.5188;tetrapyrrole.biosynthesis.I.(from.glutamate)                  | F    | 60 <i>No chemical or reaction of interest.</i>                         |
| Breakdown.Chemical     | PWY.5994;palmitate.biosynthesis.I.(animals.and.fungi)                  | F    | 60 <i>No chemical or reaction of interest.</i>                         |
| Breakdown.Nucleic      | PWY.6612;superpathway.of.tetrahydrofolate.biosynthesis                 | F    | 60 <i>No chemical or reaction of interest.</i>                         |
| Breakdown.Nucleic      | SALVADEHYPOX.PWY;adenosine.nucleotides.degradation.II                  | F    | 60 <i>No chemical or reaction of interest.</i>                         |
| Breakdown.Lipid        | PWY.6981;chitin.biosynthesis                                           | F    | 59 <i>Human-associated pathway.</i>                                    |
| Cycle.RuMP             | RUMP.PWY;formaldehyde.oxidation.I                                      | F    | 59 <i>No chemical or reaction of interest.</i>                         |
| Breakdown.Amino        | TYRFUMCAT.PWY;L.tyrosine.degradation.I                                 | F    | 59 <i>No chemical or reaction of interest.</i>                         |
| Synthesis.Nucleic      | PWY.6797;6.hydroxymethyl.dihydropterin.diphosphate.biosynthesis.II     | F    | 58 <i>No chemical or reaction of interest.</i>                         |
| Breakdown.Lipid        | PWY.7198;pyrimidine.deoxyribonucleotides.de.novo.biosynthesis.IV       | F    | 58 <i>No chemical or reaction of interest.</i>                         |
| Breakdown.Nucleic      | PWY.7371;14.dihydroxy.6.naphthoate.biosynthesis.II                     | F    | 58 <i>No chemical or reaction of interest.</i>                         |
| Synthesis.Nucleic      | PWY.1042;glycolysis.IV.(plant.cytosol)                                 | F    | 57 <i>No chemical or reaction of interest.</i>                         |
| Breakdown.Chemical     | PWY.5509;adenosylcobalamin.biosynthesis.from.cobyrinate.ac.diami       | F    | 57 <i>No chemical or reaction of interest.</i>                         |
| Synthesis.Amino        | PRPP.PWY;superpathway.of.histidine.purine.and.pyrimidine.biosynth      | F    | 56 <i>No chemical or reaction of interest.</i>                         |
| Breakdown.Lipid        | PWY.6993;nicotine.degradation.II.(pyrrolidine.pathway)                 | F    | 56 <i>Human-associated pathway.</i>                                    |
| Breakdown.Lipid        | PWY.7606;docosahexaenoate.biosynthesis.III.(mammals)                   | F    | 56 <i>No chemical or reaction of interest.</i>                         |
| Cycle.Carbon           | PWY.5022;4.aminobutanoate.degradation.V                                | F    | 55 <i>Plant-specific oxygen influenced pathway.</i>                    |
| Cycle.Carbon           | PWY.7312;dTDP.D.beta.fucofuranose.biosynthesis                         | F    | 54 <i>Plant-specific oxygen influenced pathway.</i>                    |
| Breakdown.Chemical     | METHANOGENESIS.PWY;methanogenesis.from.H2.and.CO2                      | F    | 53 <i>No chemical or reaction of interest.</i>                         |
| Synthesis.Amino        | POLYAMINSYN3.PWY;superpathway.of.polyamine.biosynthesis.II             | F    | 53 <i>No chemical or reaction of interest.</i>                         |
| Fermentation           | PWY.5182;toluene.degradation.II.(aerobic).(via.4.methylcatechol)       | F    | 53 <i>Narrow-scope Fermentation reaction.</i>                          |
| Synthesis.Lipid        | PWY.6545;pyrimidine.deoxyribonucleotides.de.novo.biosynthesis.III      | F    | 53 <i>No chemical or reaction of interest.</i>                         |
| Synthesis.Nucleic      | PWY.7377;cob(II)yrinate.ac.diamide.biosynthesis.I.(early.cobalt.insert | F    | 53 <i>No chemical or reaction of interest.</i>                         |
| Respiration            | P4.PWY;superpathway.of.L.lysine.L.threonine.and.L.methionine.bios      | F    | 52 <i>Excluded for legibility. Respiration reaction.</i>               |
| Synthesis.Nucleic      | PWY.7342;superpathway.of.nicotine.biosynthesis                         | F    | 52 <i>No chemical or reaction of interest.</i>                         |
| Fermentation           | PWY0.1586;peptidoglycan.maturation.(meso.diaminopimelate.contain       | F    | 51 <i>Eukaryote-associated Fermentation reaction.</i>                  |
| Synthesis.Amino        | URSIN.PWY;ureide.biosynthesis                                          | F    | 51 <i>No chemical or reaction of interest.</i>                         |
| Fermentation           | PWY.5898;superpathway.of.menaquinol.12.biosynthesis                    | F    | 50 <i>Excluded for legibility. Fermentation reaction.</i>              |
| Respiration            | PWY.5913;TCA.cycle.VI.(obligate.autotrophs)                            | F    | 50 <i>Plant/Fungi-specific respiration reaction.</i>                   |
| Synthesis.Lipid        | PWY.7184;pyrimidine.deoxyribonucleotides.de.novo.biosynthesis.I        | F    | 49 <i>No chemical or reaction of interest.</i>                         |
| Synthesis.Lipid        | PWY.7288;fatty.acid.beta.oxidation.(peroxisome.yeast)                  | F    | 49 <i>No chemical or reaction of interest.</i>                         |
| Breakdown.Chemical     | PWY.2221;Entner.Doudoroff.pathway.III.(semi.phosphorylative)           | F    | 48 <i>No chemical or reaction of interest.</i>                         |
| Synthesis.Amino        | PWY.6948;sitosterol.degradation.to.androstenedione                     | F    | 48 <i>No chemical or reaction of interest.</i>                         |
| Synthesis.Antibiotic   | PWY.7049;icosapentaenoate.biosynthesis.II.(metazoa)                    | F    | 48 <i>Excluded for legibility. Antibiotic production process.</i>      |
| Breakdown.Sugar        | PWY.7431;aromatic.biogenic.amine.degradation.(bacteria)                | F    | 48 <i>No chemical or reaction of interest.</i>                         |
| Breakdown.Chemical     | PWY.5971;palmitate.biosynthesis.II.(bacteria.and.plants)               | F    | 47 <i>No chemical or reaction of interest.</i>                         |

| Category               | Pathway                                                               | Incl | Prev Criteria                                             |
|------------------------|-----------------------------------------------------------------------|------|-----------------------------------------------------------|
| Breakdown.Carbohydrate | PWY.6748;nitrate.reduction.VII.(denitrification)                      | F    | 47 No chemical or reaction of interest.                   |
| Synthesis.Chemical     | PWY.6957;mandelate.degradation.to.acetyl.CoA                          | F    | 47 Human-associated pathway.                              |
| Synthesis.Sugar        | PWY.7007;methyl.ketone.biosynthesis                                   | F    | 47 No chemical or reaction of interest.                   |
| Synthesis.Vitamin      | PWY.7208;superpathway.of.pyrimidine.nucleobases.salvage               | F    | 46 No chemical or reaction of interest.                   |
| Synthesis.Vitamin      | THISYNARA.PWY;superpathway.of.thiamin.diphosphate.biosynthesis        | F    | 46 No chemical or reaction of interest.                   |
| Breakdown.Alcohol      | GOLPDLCAT.PWY;superpathway.of.glycerol.degradation.to.13.prop         | F    | 43 No chemical or reaction of interest.                   |
| Synthesis.Carrier      | PWY.6107;chlorosalicylate.degradation                                 | F    | 43 Excluded for legibility. Electron transport carrier.   |
| Synthesis.Carrier      | PWY.6138;CMP.N.acetylneuraminate.biosynthesis.I.(eukaryotes)          | F    | 43 Excluded for legibility. Electron transport carrier.   |
| Synthesis.Amino        | PWY.6945;cholesterol.degradation.to.androstenedione.I.(cholesterol.   | F    | 42 No chemical or reaction of interest.                   |
| Breakdown.Sugar        | PWY.7211;superpathway.of.pyrimidine.deoxyribonucleotides.de.novo      | F    | 42 No chemical or reaction of interest.                   |
| Respiration            | PWY.7456;mannan.degradation                                           | F    | 39 Narrow-scope respiration reaction.                     |
| Breakdown.Amino        | LEU.DEG2.PWY;L.leucine.degradation.I                                  | F    | 38 No chemical or reaction of interest.                   |
| Breakdown.Carbohydrate | PWY.3481;superpathway.of.L.phenylalanine.and.L.tyrosine.biosynthe     | F    | 38 No chemical or reaction of interest.                   |
| Breakdown.Amino        | PWY.5198;factor.420.biosynthesis                                      | F    | 35 No chemical or reaction of interest.                   |
| Synthesis.Vitamin      | PWY.7204;pyridoxal.5.phosphate.salvage.II.(plants)                    | F    | 35 No chemical or reaction of interest.                   |
| Synthesis.Vitamin      | PWY.7209;superpathway.of.pyrimidine.ribonucleosides.degradation       | F    | 35 No chemical or reaction of interest.                   |
| Respiration            | REDCITCYC;TCA.cycle.VIII.(helicobacter)                               | F    | 35 Narrow-scope respiration reaction.                     |
| Breakdown.Amino        | ALL.CHORISMATE.PWY;superpathway.of.chorismate.metabolism              | F    | 34 No chemical or reaction of interest.                   |
| Synthesis.Carbohydrate | PWY.5861;superpathway.of.demethylmenaquinol.8.biosynthesis            | F    | 34 No chemical or reaction of interest.                   |
| Breakdown.Alcohol      | PWY.6785;hydrogen.production.VIII                                     | F    | 34 No chemical or reaction of interest.                   |
| Breakdown.Alcohol      | PWY.7238;sucrose.biosynthesis.II                                      | F    | 34 No chemical or reaction of interest.                   |
| Synthesis.Vitamin      | PWY.5100;pyruvate.fermentation.to.acetate.and.lactate.II              | F    | 33 No chemical or reaction of interest.                   |
| Synthesis.Nucleic      | UDPNACETYLGALSYN.PWY;UDP.N.acetyl.D.glucosamine.biosynthe             | F    | 33 No chemical or reaction of interest.                   |
| Breakdown.Amino        | ORNDEG.PWY;superpathway.of.ornithine.degradation                      | F    | 32 No chemical or reaction of interest.                   |
| Synthesis.Lipid        | PWY.3801;sucrose.degradation.II.(sucrose.synthase)                    | F    | 32 No chemical or reaction of interest.                   |
| Synthesis.Amino        | ARGDEG.PWY;superpathway.of.L.arginine.putrescine.and.4.aminob         | F    | 31 No chemical or reaction of interest.                   |
| Breakdown.Amino        | ORNARGDEG.PWY;superpathway.of.L.arginine.and.L.ornithine.degr         | F    | 31 No chemical or reaction of interest.                   |
| Synthesis.Carrier      | PWY.6121;5.aminoimidazole.ribonucleotide.biosynthesis.I               | F    | 31 Excluded for legibility. Electron transport carrier.   |
| Synthesis.Carrier      | PWY.6143;CMP.pseudamininate.biosynthesis                              | F    | 31 Excluded for legibility. Electron transport carrier.   |
| Synthesis.Nucleic      | PWY.7664;oleate.biosynthesis.IV.(anaerobic)                           | F    | 31 No chemical or reaction of interest.                   |
| Synthesis.Carrier      | PWY.6122;5.aminoimidazole.ribonucleotide.biosynthesis.II              | F    | 30 Excluded for legibility. Electron transport carrier.   |
| Synthesis.Carrier      | PWY.6126;superpathway.of.adenosine.nucleotides.de.novo.biosynthe      | F    | 30 Excluded for legibility. Electron transport carrier.   |
| Synthesis.Carrier      | PWY.6165;chorismate.biosynthesis.II.(archaea)                         | F    | 30 Excluded for legibility. Electron transport carrier.   |
| Synthesis.Protein      | PWY.1882;superpathway.of.C1.compounds.oxidation.to.CO2                | F    | 29 Excluded for legibility. Oxygen carrier protein.       |
| Breakdown.Alcohol      | PWY.7245;superpathway.NAD.NADP.NADH.NADPH.interconversion             | F    | 29 No chemical or reaction of interest.                   |
| Breakdown.Sugar        | GLUCARDEG.PWY;D.glucarate.degradation.I                               | F    | 28 No chemical or reaction of interest.                   |
| Breakdown.Sugar        | GLUCUROCAT.PWY;superpathway.of.beta.D.glucuronide.and.D.gluc          | F    | 28 No chemical or reaction of interest.                   |
| Breakdown.Amino        | PWY.5863;superpathway.of.phylloquinol.biosynthesis                    | F    | 26 No chemical or reaction of interest.                   |
| Synthesis.Chemical     | PWY.4981;L.proline.biosynthesis.II.(from.arginine)                    | F    | 25 No chemical or reaction of interest.                   |
| Breakdown.Chemical     | PWY.5723;Rubisco.shunt                                                | F    | 25 No chemical or reaction of interest.                   |
| Breakdown.Alcohol      | PWY66.389;phytol.degradation                                          | F    | 25 No chemical or reaction of interest.                   |
| Breakdown.Chemical     | PWY.5532;adenosine.nucleotides.degradation.IV                         | F    | 24 Excluded for legibility. Oxygen influenced pathway.    |
| Breakdown.Chemical     | PWY.561;superpathway.of.glyoxylate.cycle.and.fatty.acid.degradatio    | F    | 24 Excluded for legibility. Oxygen influenced pathway.    |
| Synthesis.Amino        | PWY.6803;phosphatidylcholine.acyl.editing                             | F    | 24 No chemical or reaction of interest.                   |
| Breakdown.Sugar        | RHAMCAT.PWY;L.rhamnose.degradation.I                                  | F    | 24 No chemical or reaction of interest.                   |
| Breakdown.Chemical     | GLUDEG.II.PWY;L.glutamate.degradation.VII.(to.butanoate)              | F    | 23 No chemical or reaction of interest.                   |
| Breakdown.Structural   | PWY.7316;dTDP.N.acetylvirosamine.biosynthesis                         | F    | 23 No chemical or reaction of interest.                   |
| Breakdown.Alcohol      | P562.PWY;myo.inositol.degradation.I                                   | F    | 22 No chemical or reaction of interest.                   |
| Synthesis.Carrier      | PWY.5103;L.isoleucine.biosynthesis.III                                | F    | 22 Eukaryote-specific electron transport carrier.         |
| Synthesis.Lipid        | PWY.5345;superpathway.of.L.methionine.biosynthesis.(by.sulfhydryle    | F    | 22 No chemical or reaction of interest.                   |
| Synthesis.Lipid        | PWY.6892;thiazole.biosynthesis.I.(E.coli)                             | F    | 22 No chemical or reaction of interest.                   |
| Synthesis.Lipid        | PWY66.391;fatty.acid.beta.oxidation.VI.(peroxisome)                   | F    | 22 No chemical or reaction of interest.                   |
| Synthesis.Lipid        | KDO.NAGLIPASYN.PWY;superpathway.of.(Kdo)2.lipid.A.biosynthesi         | F    | 20 No chemical or reaction of interest.                   |
| Synthesis.Lipid        | PWYG.321;mycolate.biosynthesis                                        | F    | 20 No chemical or reaction of interest.                   |
| Breakdown.Sugar        | GALACT.GLUCUROCAT.PWY;superpathway.of.hexuronide.and.hexi             | F    | 19 No chemical or reaction of interest.                   |
| Breakdown.Sugar        | GLUCARGALACTSUPER.PWY;superpathway.of.D.glucarate.and.D.ε             | F    | 19 No chemical or reaction of interest.                   |
| Breakdown.Lipid        | LIPASYN.PWY;phospholipases                                            | F    | 19 No chemical or reaction of interest.                   |
| Breakdown.Nucleic      | P165.PWY;superpathway.of.purines.degradation.in.plants                | F    | 19 No chemical or reaction of interest.                   |
| Synthesis.Carrier      | PWY.6147;6.hydroxymethyl.dihydropterin.diphosphate.biosynthesis.I     | F    | 19 Eukaryote-specific electron transport carrier.         |
| Synthesis.Carrier      | PWY.6148;tetrahydromethanopterin.biosynthesis                         | F    | 19 Eukaryote-specific electron transport carrier.         |
| Synthesis.Carrier      | PWY.6151;S.adenosyl.L.methionine.cycle.I                              | F    | 19 Eukaryote-specific electron transport carrier.         |
| Synthesis.Carrier      | PWY.6163;chorismate.biosynthesis.from.3.dehydroquinone                | F    | 19 Eukaryote-specific electron transport carrier.         |
| Breakdown.Chemical     | P621.PWY;nylon.6.oligomer.degradation                                 | F    | 18 No chemical or reaction of interest.                   |
| Synthesis.Amino        | PWY.5838;superpathway.of.menaquinol.8.biosynthesis.I                  | F    | 18 No chemical or reaction of interest.                   |
| Breakdown.Chemical     | PWY.6277;superpathway.of.5.aminoimidazole.ribonucleotide.biosynt      | F    | 18 No chemical or reaction of interest.                   |
| Breakdown.Vitamin      | PWY.7388;octanoyl.(acyl.carrier.protein).biosynthesis.(mitochondria.) | F    | 18 No chemical or reaction of interest.                   |
| Breakdown.Sugar        | FUC.RHAMCAT.PWY;superpathway.of.fucose.and.rhamnose.degrad            | F    | 17 No chemical or reaction of interest.                   |
| Synthesis.Amino        | P101.PWY;ectoine.biosynthesis                                         | F    | 17 No chemical or reaction of interest.                   |
| Synthesis.Nucleic      | PWY.5855;ubiquinol.7.biosynthesis.(prokaryotic)                       | F    | 17 No chemical or reaction of interest.                   |
| Breakdown.Sugar        | PWY.621;sucrose.degradation.III.(sucrose.invertase)                   | F    | 17 Eukaryote-specific central metabolism sugar breakdown. |
| Breakdown.Carbohydrate | PWY.7111;pyruvate.fermentation.to.isobutanol.(engineered)             | F    | 17 No chemical or reaction of interest.                   |
| Synthesis.Vitamin      | PWY.7332;superpathway.of.UDP.N.acetylglucosamine.derived.O.anti       | F    | 17 Artificially engineered pathway.                       |

| Category            | Pathway                                                               | Incl | Prev Criteria                                         |
|---------------------|-----------------------------------------------------------------------|------|-------------------------------------------------------|
| Breakdown.Chemical  | 3.HYDROXYPHENYLACETATE.DEGRADATION.PWY;4.hydroxyphe                   | F    | 16 No chemical or reaction of interest.               |
| Breakdown.Sugar     | GALACTUROCAT.PWY;D.galacturonate.degradation.I                        | F    | 16 No chemical or reaction of interest.               |
| Breakdown.Nucleic   | P164.PWY;purine.nucleobases.degradation.I.(anaerobic)                 | F    | 16 No chemical or reaction of interest.               |
| Breakdown.Nucleic   | PWY.7376;cob(II)yrinate.ac.diamide.biosynthesis.II.(late.cobalt.incor | F    | 16 No chemical or reaction of interest.               |
| Synthesis.Lipid     | PWY.5104;L.isoleucine.biosynthesis.IV                                 | F    | 15 No chemical or reaction of interest.               |
| Synthesis.Alcohol   | PWY.7200;superpathway.of.pyrimidine.deoxyribonucleoside.salvage       | F    | 15 Artificially engineered pathway.                   |
| Breakdown.Sugar     | FUCCAT.PWY;fucose.degradation                                         | F    | 14 No chemical or reaction of interest.               |
| Breakdown.Chemical  | GALLATE.DEGRADATION.I.PWY;gallate.degradation.II                      | F    | 14 No chemical or reaction of interest.               |
| Breakdown.Chemical  | GLYCOL.GLYOXDEG.PWY;superpathway.of.glycol.metabolism.and.i           | F    | 14 No chemical or reaction of interest.               |
| Processing.Carrier  | PWY.7446;sulfoglycolysis                                              | F    | 14 Yeast-specific electron transport carrier.         |
| Breakdown.Sugar     | PWY.7626;bacilysin.biosynthesis                                       | F    | 14 No chemical or reaction of interest.               |
| Breakdown.Alcohol   | HCAMHPDEG.PWY;3.phenylpropanoate.and.3.(3.hydroxyphenyl)pro           | F    | 13 No chemical or reaction of interest.               |
| Breakdown.Amino     | ILEUDEG.PWY;L.isoleucine.degradation.I                                | F    | 13 No chemical or reaction of interest.               |
| Breakdown.Alcohol   | PWY.1361;benzoyl.CoA.degradation.I.(aerobic)                          | F    | 13 No chemical or reaction of interest.               |
| Breakdown.Amino     | PWY.4242;pantothenate.and.coenzyme.A.biosynthesis.III                 | F    | 13 No chemical or reaction of interest.               |
| Breakdown.Chemical  | PWY.7084;nitrifier.denitrification                                    | F    | 13 No chemical or reaction of interest.               |
| Breakdown.Amino     | THREOCAT.PWY;superpathway.of.L.threonine.metabolism                   | F    | 13 No chemical or reaction of interest.               |
| Synthesis.Carrier   | PWY.4984;urea.cycle                                                   | F    | 12 Narrow-scope electron transport carrier.           |
| Breakdown.Chemical  | PWY.6572;chondroitin.sulfate.degradation.I.(bacterial)                | F    | 12 No chemical or reaction of interest.               |
| Synthesis.Amino     | PWY.6823;molybdenum.cofactor.biosynthesis                             | F    | 12 No chemical or reaction of interest.               |
| Breakdown.Amino     | PWY30.19;ubiquinol.6.biosynthesis.from.4.hydroxybenzoate.(eukary      | F    | 12 No chemical or reaction of interest.               |
| Respiration         | PWY.5791;14.dihydroxy.2.naphthoate.biosynthesis.II.(plants)           | F    | 11 Plant-specific central metabolism and respiration. |
| Synthesis.Vitamin   | PWY.5850;superpathway.of.menaquinol.6.biosynthesis.I                  | F    | 11 No chemical or reaction of interest.               |
| Breakdown.Chemical  | PWY.5870;ubiquinol.8.biosynthesis.(eukaryotic)                        | F    | 11 No chemical or reaction of interest.               |
| Breakdown.Alcohol   | PWY.6470;peptidoglycan.biosynthesis.V.(beta.lactam.resistance)        | F    | 11 No chemical or reaction of interest.               |
| Breakdown.Amino     | PWY.6562;norspermidine.biosynthesis                                   | F    | 11 No chemical or reaction of interest.               |
| Breakdown.Sugar     | PWY.7235;superpathway.of.ubiquinol.6.biosynthesis.(eukaryotic)        | F    | 11 No chemical or reaction of interest.               |
| Breakdown.Chemical  | PWY.4221;pantothenate.and.coenzyme.A.biosynthesis.II.(plants)         | F    | 10 No chemical or reaction of interest.               |
| Breakdown.Amino     | PWY.5138;unsaturated.even.numbered.fatty.acid.beta.oxidation          | F    | 10 No chemical or reaction of interest.               |
| Synthesis.Lipid     | PWY.6307;L.tryptophan.degradation.X.(mammalian.via.tryptamine)        | F    | 10 No chemical or reaction of interest.               |
| Synthesis.Lipid     | PWY1G.0;mycothiol.biosynthesis                                        | F    | 10 No chemical or reaction of interest.               |
| Breakdown.Amino     | VALDEG.PWY;L.valine.degradation.I                                     | F    | 10 No chemical or reaction of interest.               |
| Prevalence.Excluded | PWY.5514;UDP.N.acetyl.D.galactosamine.biosynthesis.II                 | F    | 9 Prevalence < 10% of cultured samples.               |
| Prevalence.Excluded | PWY.4202;arsenate.detoxification.I.(glutaredoxin)                     | F    | 8 Prevalence < 10% of cultured samples.               |
| Prevalence.Excluded | PWY.5845;superpathway.of.menaquinol.9.biosynthesis                    | F    | 8 Prevalence < 10% of cultured samples.               |
| Prevalence.Excluded | PWY.7409;phospholipid.remodeling.(phosphatidylethanolamine.yeast      | F    | 8 Prevalence < 10% of cultured samples.               |
| Prevalence.Excluded | PWY.6641;superpathway.of.sulfolactate.degradation                     | F    | 7 Prevalence < 10% of cultured samples.               |
| Prevalence.Excluded | PWY.7165;L.ascorbate.biosynthesis.VI.(engineered.pathway)             | F    | 7 Prevalence < 10% of cultured samples.               |
| Prevalence.Excluded | CODH.PWY;reductive.acetyl.coenzyme.A.pathway                          | F    | 6 Prevalence < 10% of cultured samples.               |
| Prevalence.Excluded | GALACTARDEG.PWY;D.galactarate.degradation.I                           | F    | 6 Prevalence < 10% of cultured samples.               |
| Prevalence.Excluded | PWY.5121;superpathway.of.geranylgeranyl.diphosphate.biosynthesis      | F    | 6 Prevalence < 10% of cultured samples.               |
| Prevalence.Excluded | PWY.5862;superpathway.of.demethylmenaquinol.9.biosynthesis            | F    | 6 Prevalence < 10% of cultured samples.               |
| Prevalence.Excluded | PWY.6305;putrescine.biosynthesis.IV                                   | F    | 6 Prevalence < 10% of cultured samples.               |
| Prevalence.Excluded | AEROBACTINSYN.PWY;aerobactin.biosynthesis                             | F    | 5 Prevalence < 10% of cultured samples.               |
| Prevalence.Excluded | PWY.6270;isoprene.biosynthesis.I                                      | F    | 5 Prevalence < 10% of cultured samples.               |
| Prevalence.Excluded | PWY.6608;guanosine.nucleotides.degradation.III                        | F    | 5 Prevalence < 10% of cultured samples.               |
| Prevalence.Excluded | PWY.7234;inosine.5.phosphate.biosynthesis.III                         | F    | 5 Prevalence < 10% of cultured samples.               |
| Prevalence.Excluded | PWY0.166;superpathway.of.pyrimidine.deoxyribonucleotides.de.novo      | F    | 5 Prevalence < 10% of cultured samples.               |
| Prevalence.Excluded | P108.PWY;pyruvate.fermentation.to.propanoate.I                        | F    | 4 Prevalence < 10% of cultured samples.               |
| Prevalence.Excluded | PWY.5079;L.phenylalanine.degradation.III                              | F    | 4 Prevalence < 10% of cultured samples.               |
| Prevalence.Excluded | PWY.5173;superpathway.of.acetyl.CoA.biosynthesis                      | F    | 4 Prevalence < 10% of cultured samples.               |
| Prevalence.Excluded | PWY.5507;adenosylcobalamin.biosynthesis.I.(early.cobalt.insertion)    | F    | 4 Prevalence < 10% of cultured samples.               |
| Prevalence.Excluded | PWY.5705;allantoin.degradation.to.glyoxylate.III                      | F    | 4 Prevalence < 10% of cultured samples.               |
| Prevalence.Excluded | PWY.7242;D.fructuronate.degradation                                   | F    | 4 Prevalence < 10% of cultured samples.               |
| Prevalence.Excluded | PWY.7268;NAD.NADP.NADH.NADPH.cytosolic.interconversion.(yeas          | F    | 4 Prevalence < 10% of cultured samples.               |
| Prevalence.Excluded | PWY.5280;L.lysine.degradation.IV                                      | F    | 3 Prevalence < 10% of cultured samples.               |
| Prevalence.Excluded | PWY.6891;thiazole.biosynthesis.II.(Bacillus)                          | F    | 3 Prevalence < 10% of cultured samples.               |
| Prevalence.Excluded | PWY.7003;glycerol.degradation.to.butanol                              | F    | 3 Prevalence < 10% of cultured samples.               |
| Prevalence.Excluded | PWY.7059;fumigaclavine.biosynthesis                                   | F    | 3 Prevalence < 10% of cultured samples.               |
| Prevalence.Excluded | PWY.7282;4.amino.2.methyl.5.phosphomethylpyrimidine.biosynthesis      | F    | 3 Prevalence < 10% of cultured samples.               |
| Prevalence.Excluded | ALLANTOINDEG.PWY;superpathway.of.allantoin.degradation.in.yeas        | F    | 2 Prevalence < 10% of cultured samples.               |
| Prevalence.Excluded | PWY.5183;superpathway.of.aerobic.toluene.degradation                  | F    | 2 Prevalence < 10% of cultured samples.               |
| Prevalence.Excluded | PWY.6731;starch.degradation.III                                       | F    | 2 Prevalence < 10% of cultured samples.               |
| Prevalence.Excluded | PWY0.1241;ADP.L.glycero.beta.D.manno.heptose.biosynthesis             | F    | 2 Prevalence < 10% of cultured samples.               |
| Prevalence.Excluded | PWY0.1261;anhydromuropeptides.recycling                               | F    | 2 Prevalence < 10% of cultured samples.               |
| Prevalence.Excluded | PWY.4361;S.methyl.5.thio.alpha.D.ribose.1.phosphate.degradation       | F    | 1 Prevalence < 10% of cultured samples.               |
| Prevalence.Excluded | PWY.6598;sciadonate.biosynthesis                                      | F    | 1 Prevalence < 10% of cultured samples.               |
| Prevalence.Excluded | PWY.6728;methylaspartate.cycle                                        | F    | 1 Prevalence < 10% of cultured samples.               |
| Prevalence.Excluded | PWY.6953;dUDP.3.acetamido.36.dideoxy.alpha.D.galactose.biosynth       | F    | 1 Prevalence < 10% of cultured samples.               |
| Prevalence.Excluded | PWY.7187;pyrimidine.deoxyribonucleotides.de.novo.biosynthesis.II      | F    | 1 Prevalence < 10% of cultured samples.               |
| Prevalence.Excluded | PWY.7286;7.(3.amino.3.carboxypropyl).wyosine.biosynthesis             | F    | 1 Prevalence < 10% of cultured samples.               |
| Prevalence.Excluded | PWY.7373;superpathway.of.demethylmenaquinol.6.biosynthesis.II         | F    | 1 Prevalence < 10% of cultured samples.               |

| Category            | Pathway                                                             | Incl | Prev Criteria                         |
|---------------------|---------------------------------------------------------------------|------|---------------------------------------|
| Prevalence.Excluded | PWY0.1061;superpathway.of.L.alanine.biosynthesis                    | F 1  | Prevalence < 10% of cultured samples. |
| Prevalence.Excluded | PWY0.1277;3.phenylpropanoate.and.3.(3.hydroxyphenyl)propanoate      | F 1  | Prevalence < 10% of cultured samples. |
| Uncultured.Only     | 4.HYDROXYMANDELATE.DEGRADATION.PWY;4.hydroxymandelat                | F 0  | Observed only in uncultured samples.  |
| Uncultured.Only     | CENTFERM.PWY;pyruvate.fermentation.to.butanoate                     | F 0  | Observed only in uncultured samples.  |
| Uncultured.Only     | CHLOROPHYLL.SYN;chlorophyllide.a.biosynthesis.I.(aerobic.light.de   | F 0  | Observed only in uncultured samples.  |
| Uncultured.Only     | CRNFORCAT.PWY;creatinine.degradation.I                              | F 0  | Observed only in uncultured samples.  |
| Uncultured.Only     | DHGLUCONATE.PYR.CAT.PWY;glucose.degradation.(oxidative)             | F 0  | Observed only in uncultured samples.  |
| Uncultured.Only     | ERGOSTEROL.SYN.PWY;superpathway.of.ergosterol.biosynthesis.I        | F 0  | Observed only in uncultured samples.  |
| Uncultured.Only     | GALLATE.DEGRADATION.II.PWY;gallate.degradation.I                    | F 0  | Observed only in uncultured samples.  |
| Uncultured.Only     | GLUDEG.I.PWY;GABA.shunt                                             | F 0  | Observed only in uncultured samples.  |
| Uncultured.Only     | GLYCOLYSIS.TCA.GLYOX.BYPASS;superpathway.of.glycolysis.pyru         | F 0  | Observed only in uncultured samples.  |
| Uncultured.Only     | LPSSYN.PWY;superpathway.of.lipopolysaccharide.biosynthesis          | F 0  | Observed only in uncultured samples.  |
| Uncultured.Only     | LYSINE.AMINOAD.PWY;L.lysine.biosynthesis.IV                         | F 0  | Observed only in uncultured samples.  |
| Uncultured.Only     | LYSINE.DEG1.PWY;L.lysine.degradation.XI.(mammalian)                 | F 0  | Observed only in uncultured samples.  |
| Uncultured.Only     | MANNOSYL.CHITO.DOLICHOL.BIOSYNTHESIS;protein.N.glycosyla            | F 0  | Observed only in uncultured samples.  |
| Uncultured.Only     | MET.SAM.PWY;superpathway.of.S.adenosyl.L.methionine.biosynthe       | F 0  | Observed only in uncultured samples.  |
| Uncultured.Only     | METH.ACETATE.PWY;methanogenesis.from.acetate                        | F 0  | Observed only in uncultured samples.  |
| Uncultured.Only     | METHGLYUT.PWY;superpathway.of.methylglyoxal.degradation             | F 0  | Observed only in uncultured samples.  |
| Uncultured.Only     | NONMEVIPP.PWY;methylerythritol.phosphate.pathway.I                  | F 0  | Observed only in uncultured samples.  |
| Uncultured.Only     | P162.PWY;L.glutamate.degradation.V.(via.hydroxyglutarate)           | F 0  | Observed only in uncultured samples.  |
| Uncultured.Only     | P163.PWY;L.lysine.fermentation.to.acetate.and.butanoate             | F 0  | Observed only in uncultured samples.  |
| Uncultured.Only     | P184.PWY;protocatechuate.degradation.I.(meta.cleavage.pathway)      | F 0  | Observed only in uncultured samples.  |
| Uncultured.Only     | P241.PWY;coenzyme.B.biosynthesis                                    | F 0  | Observed only in uncultured samples.  |
| Uncultured.Only     | P261.PWY;coenzyme.M.biosynthesis.I                                  | F 0  | Observed only in uncultured samples.  |
| Uncultured.Only     | P281.PWY;3.phenylpropanoate.degradation                             | F 0  | Observed only in uncultured samples.  |
| Uncultured.Only     | PHOTOALL.PWY;oxygenic.photosynthesis                                | F 0  | Observed only in uncultured samples.  |
| Uncultured.Only     | PROPFERM.PWY;L.alanine.fermentation.to.propanoate.and.acetate       | F 0  | Observed only in uncultured samples.  |
| Uncultured.Only     | PWY.2942;L.lysine.biosynthesis.III                                  | F 0  | Observed only in uncultured samples.  |
| Uncultured.Only     | PWY.3001;superpathway.of.L.isoleucine.biosynthesis.I                | F 0  | Observed only in uncultured samples.  |
| Uncultured.Only     | PWY.3841;folate.transformations.II                                  | F 0  | Observed only in uncultured samples.  |
| Uncultured.Only     | PWY.4321;L.glutamate.degradation.IV                                 | F 0  | Observed only in uncultured samples.  |
| Uncultured.Only     | PWY.4722;creatinine.degradation.II                                  | F 0  | Observed only in uncultured samples.  |
| Uncultured.Only     | PWY.5004;superpathway.of.L.citrulline.metabolism                    | F 0  | Observed only in uncultured samples.  |
| Uncultured.Only     | PWY.5005;biotin.biosynthesis.II                                     | F 0  | Observed only in uncultured samples.  |
| Uncultured.Only     | PWY.5067;glycogen.biosynthesis.II.(from.UDP.D.Glucose)              | F 0  | Observed only in uncultured samples.  |
| Uncultured.Only     | PWY.5080;very.long.chain.fatty.acid.biosynthesis.I                  | F 0  | Observed only in uncultured samples.  |
| Uncultured.Only     | PWY.5097;L.lysine.biosynthesis.VI                                   | F 0  | Observed only in uncultured samples.  |
| Uncultured.Only     | PWY.5101;L.isoleucine.biosynthesis.II                               | F 0  | Observed only in uncultured samples.  |
| Uncultured.Only     | PWY.5129;sphingolipid.biosynthesis.(plants)                         | F 0  | Observed only in uncultured samples.  |
| Uncultured.Only     | PWY.5154;L.arginine.biosynthesis.III.(via.N.acetyl.L.citrulline)    | F 0  | Observed only in uncultured samples.  |
| Uncultured.Only     | PWY.5177;glutaryl.CoA.degradation                                   | F 0  | Observed only in uncultured samples.  |
| Uncultured.Only     | PWY.5304;superpathway.of.sulfur.oxidation.(Acidianus.ambivalens)    | F 0  | Observed only in uncultured samples.  |
| Uncultured.Only     | PWY.5306;superpathway.of.thiosulfate.metabolism.(Desulfovibrio.sulf | F 0  | Observed only in uncultured samples.  |
| Uncultured.Only     | PWY.5328;superpathway.of.L.methionine.salvage.and.degradation       | F 0  | Observed only in uncultured samples.  |
| Uncultured.Only     | PWY.5347;superpathway.of.L.methionine.biosynthesis.(transsulfurati  | F 0  | Observed only in uncultured samples.  |
| Uncultured.Only     | PWY.5381;pyridine.nucleotide.cycling.(plants)                       | F 0  | Observed only in uncultured samples.  |
| Uncultured.Only     | PWY.5415;catechol.degradation.I.(meta.cleavage.pathway)             | F 0  | Observed only in uncultured samples.  |
| Uncultured.Only     | PWY.5420;catechol.degradation.II.(meta.cleavage.pathway)            | F 0  | Observed only in uncultured samples.  |
| Uncultured.Only     | PWY.5430;meta.cleavage.pathway.of.aromatic.compounds                | F 0  | Observed only in uncultured samples.  |
| Uncultured.Only     | PWY.5431;aromatic.compounds.degradation.via.beta.ketoadipate        | F 0  | Observed only in uncultured samples.  |
| Uncultured.Only     | PWY.5531;chlorophyllide.a.biosynthesis.II.(anaerobic)               | F 0  | Observed only in uncultured samples.  |
| Uncultured.Only     | PWY.5647;2.nitrobenzoate.degradation.I                              | F 0  | Observed only in uncultured samples.  |
| Uncultured.Only     | PWY.5655;L.tryptophan.degradation.IX                                | F 0  | Observed only in uncultured samples.  |
| Uncultured.Only     | PWY.5659;GDP.mannose.biosynthesis                                   | F 0  | Observed only in uncultured samples.  |
| Uncultured.Only     | PWY.5667;CDP.diacylglycerol.biosynthesis.I                          | F 0  | Observed only in uncultured samples.  |
| Uncultured.Only     | PWY.5675;nitrate.reduction.V.(assimilatory)                         | F 0  | Observed only in uncultured samples.  |
| Uncultured.Only     | PWY.5676;acetyl.CoA.fermentation.to.butanoate.II                    | F 0  | Observed only in uncultured samples.  |
| Uncultured.Only     | PWY.5692;allantoin.degradation.to.glyoxylate.II                     | F 0  | Observed only in uncultured samples.  |
| Uncultured.Only     | PWY.5741;ethylmalonyl.CoA.pathway                                   | F 0  | Observed only in uncultured samples.  |
| Uncultured.Only     | PWY.5747;2.methylcitrate.cycle.II                                   | F 0  | Observed only in uncultured samples.  |
| Uncultured.Only     | PWY.5751;phenylethanol.biosynthesis                                 | F 0  | Observed only in uncultured samples.  |
| Uncultured.Only     | PWY.5840;superpathway.of.menaquinol.7.biosynthesis                  | F 0  | Observed only in uncultured samples.  |
| Uncultured.Only     | PWY.5856;ubiquinol.9.biosynthesis.(prokaryotic)                     | F 0  | Observed only in uncultured samples.  |
| Uncultured.Only     | PWY.5857;ubiquinol.10.biosynthesis.(prokaryotic)                    | F 0  | Observed only in uncultured samples.  |
| Uncultured.Only     | PWY.5860;superpathway.of.demethylmenaquinol.6.biosynthesis.I        | F 0  | Observed only in uncultured samples.  |
| Uncultured.Only     | PWY.5871;ubiquinol.9.biosynthesis.(eukaryotic)                      | F 0  | Observed only in uncultured samples.  |
| Uncultured.Only     | PWY.5872;ubiquinol.10.biosynthesis.(eukaryotic)                     | F 0  | Observed only in uncultured samples.  |
| Uncultured.Only     | PWY.5899;superpathway.of.menaquinol.13.biosynthesis                 | F 0  | Observed only in uncultured samples.  |
| Uncultured.Only     | PWY.5918;superpathway.of.heme.biosynthesis.from.glutamate           | F 0  | Observed only in uncultured samples.  |
| Uncultured.Only     | PWY.5941;glycogen.degradation.II.(eukaryotic)                       | F 0  | Observed only in uncultured samples.  |
| Uncultured.Only     | PWY.5973;cis.vaccenate.biosynthesis                                 | F 0  | Observed only in uncultured samples.  |
| Uncultured.Only     | PWY.5989;stearate.biosynthesis.II.(bacteria.and.plants)             | F 0  | Observed only in uncultured samples.  |

| Category        | Pathway                                                               | Incl | Prev Criteria |                                      |
|-----------------|-----------------------------------------------------------------------|------|---------------|--------------------------------------|
| Uncultured.Only | PWY.6071;superpathway.of.phenylethylamine.degradation                 | F    | 0             | Observed only in uncultured samples. |
| Uncultured.Only | PWY.6074;zymosterol.biosynthesis                                      | F    | 0             | Observed only in uncultured samples. |
| Uncultured.Only | PWY.6281;L.selenocysteine.biosynthesis.II.(archaea.and.eukaryotes)    | F    | 0             | Observed only in uncultured samples. |
| Uncultured.Only | PWY.6282;palmitoleate.biosynthesis.I.(from.(5Z).dodec.5.enoate)       | F    | 0             | Observed only in uncultured samples. |
| Uncultured.Only | PWY.6284;superpathway.of.unsaturated.fatty.acids.biosynthesis.(E.c    | F    | 0             | Observed only in uncultured samples. |
| Uncultured.Only | PWY.6285;superpathway.of.fatty.acids.biosynthesis.(E.coli)            | F    | 0             | Observed only in uncultured samples. |
| Uncultured.Only | PWY.6342;noradrenaline.and.adrenaline.degradation                     | F    | 0             | Observed only in uncultured samples. |
| Uncultured.Only | PWY.6349;CDP.archaeol.biosynthesis                                    | F    | 0             | Observed only in uncultured samples. |
| Uncultured.Only | PWY.6351;D.myo.inositol.(145).trisphosphate.biosynthesis              | F    | 0             | Observed only in uncultured samples. |
| Uncultured.Only | PWY.6353;purine.nucleotides.degradation.II.(aerobic)                  | F    | 0             | Observed only in uncultured samples. |
| Uncultured.Only | PWY.6386;UDP.N.acetylmuramoyl.pentapeptide.biosynthesis.II.(lysin     | F    | 0             | Observed only in uncultured samples. |
| Uncultured.Only | PWY.6387;UDP.N.acetylmuramoyl.pentapeptide.biosynthesis.I.(mesc       | F    | 0             | Observed only in uncultured samples. |
| Uncultured.Only | PWY.6415;L.ascorbate.biosynthesis.V                                   | F    | 0             | Observed only in uncultured samples. |
| Uncultured.Only | PWY.6471;peptidoglycan.biosynthesis.IV.(Enterococcus.faecium)         | F    | 0             | Observed only in uncultured samples. |
| Uncultured.Only | PWY.6478;GDP.D.glycero.alpha.D.manno.heptose.biosynthesis             | F    | 0             | Observed only in uncultured samples. |
| Uncultured.Only | PWY.6486;D.galacturonate.degradation.II                               | F    | 0             | Observed only in uncultured samples. |
| Uncultured.Only | PWY.6503;superpathway.of.ergotamine.biosynthesis                      | F    | 0             | Observed only in uncultured samples. |
| Uncultured.Only | PWY.6505;L.tryptophan.degradation.XII.(Geobacillus)                   | F    | 0             | Observed only in uncultured samples. |
| Uncultured.Only | PWY.6519;8.amino.7.oxononanoate.biosynthesis.I                        | F    | 0             | Observed only in uncultured samples. |
| Uncultured.Only | PWY.6565;superpathway.of.polyamine.biosynthesis.III                   | F    | 0             | Observed only in uncultured samples. |
| Uncultured.Only | PWY.6595;superpathway.of.guanosine.nucleotides.degradation.(plan      | F    | 0             | Observed only in uncultured samples. |
| Uncultured.Only | PWY.6596;adenosine.nucleotides.degradation.I                          | F    | 0             | Observed only in uncultured samples. |
| Uncultured.Only | PWY.6606;guanosine.nucleotides.degradation.II                         | F    | 0             | Observed only in uncultured samples. |
| Uncultured.Only | PWY.6609;adenine.and.adenosine.salvage.III                            | F    | 0             | Observed only in uncultured samples. |
| Uncultured.Only | PWY.6628;superpathway.of.L.phenylalanine.biosynthesis                 | F    | 0             | Observed only in uncultured samples. |
| Uncultured.Only | PWY.6654;phosphopantothenate.biosynthesis.III                         | F    | 0             | Observed only in uncultured samples. |
| Uncultured.Only | PWY.6660;2.heptyl.3.hydroxy.4(1H).quinolone.biosynthesis              | F    | 0             | Observed only in uncultured samples. |
| Uncultured.Only | PWY.6662;superpathway.of.quinolone.and.alkylquinolone.biosynthesi     | F    | 0             | Observed only in uncultured samples. |
| Uncultured.Only | PWY.6690;cinnamate.and.3.hydroxycinnamate.degradation.to.2.oxo        | F    | 0             | Observed only in uncultured samples. |
| Uncultured.Only | PWY.6708;ubiquinol.8.biosynthesis.(prokaryotic)                       | F    | 0             | Observed only in uncultured samples. |
| Uncultured.Only | PWY.6737;starch.degradation.V                                         | F    | 0             | Observed only in uncultured samples. |
| Uncultured.Only | PWY.6829;tRNA.methylation.(yeast)                                     | F    | 0             | Observed only in uncultured samples. |
| Uncultured.Only | PWY.6834;spermidine.biosynthesis.III                                  | F    | 0             | Observed only in uncultured samples. |
| Uncultured.Only | PWY.6859;all.trans.farnesol.biosynthesis                              | F    | 0             | Observed only in uncultured samples. |
| Uncultured.Only | PWY.6936;seleno.amino.acid.biosynthesis                               | F    | 0             | Observed only in uncultured samples. |
| Uncultured.Only | PWY.6969;TCA.cycle.V.(2.oxoglutarate;ferredoxin.oxidoreductase)       | F    | 0             | Observed only in uncultured samples. |
| Uncultured.Only | PWY.7036;very.long.chain.fatty.acid.biosynthesis.II                   | F    | 0             | Observed only in uncultured samples. |
| Uncultured.Only | PWY.7046;4.coumarate.degradation.(anaerobic)                          | F    | 0             | Observed only in uncultured samples. |
| Uncultured.Only | PWY.7098;vanillin.and.vanillate.degradation.II                        | F    | 0             | Observed only in uncultured samples. |
| Uncultured.Only | PWY.7118;chitin.degradation.to.ethanol                                | F    | 0             | Observed only in uncultured samples. |
| Uncultured.Only | PWY.7124;ethylene.biosynthesis.V.(engineered)                         | F    | 0             | Observed only in uncultured samples. |
| Uncultured.Only | PWY.7159;chlorophyllide.a.biosynthesis.III.(aerobic.light.independent | F    | 0             | Observed only in uncultured samples. |
| Uncultured.Only | PWY.7196;superpathway.of.pyrimidine.ribonucleosides.salvage           | F    | 0             | Observed only in uncultured samples. |
| Uncultured.Only | PWY.7197;pyrimidine.deoxyribonucleotide.phosphorylation               | F    | 0             | Observed only in uncultured samples. |
| Uncultured.Only | PWY.7218;photosynthetic.3.hydroxybutanoate.biosynthesis.(enginee      | F    | 0             | Observed only in uncultured samples. |
| Uncultured.Only | PWY.7220;adenosine.deoxyribonucleotides.de.novo.biosynthesis.II       | F    | 0             | Observed only in uncultured samples. |
| Uncultured.Only | PWY.7221;guanosine.ribonucleotides.de.novo.biosynthesis               | F    | 0             | Observed only in uncultured samples. |
| Uncultured.Only | PWY.7222;guanosine.deoxyribonucleotides.de.novo.biosynthesis.II       | F    | 0             | Observed only in uncultured samples. |
| Uncultured.Only | PWY.7228;superpathway.of.guanosine.nucleotides.de.novo.biosynth       | F    | 0             | Observed only in uncultured samples. |
| Uncultured.Only | PWY.7229;superpathway.of.adenosine.nucleotides.de.novo.biosynth       | F    | 0             | Observed only in uncultured samples. |
| Uncultured.Only | PWY.7237;myo.chiro.and.scillo.inositol.degradation                    | F    | 0             | Observed only in uncultured samples. |
| Uncultured.Only | PWY.724;superpathway.of.L.lysine.L.threonine.and.L.methionine.bios    | F    | 0             | Observed only in uncultured samples. |
| Uncultured.Only | PWY.7254;TCA.cycle.VII.(acetate.producers)                            | F    | 0             | Observed only in uncultured samples. |
| Uncultured.Only | PWY.7269;NAD.NADP.NADH.NADPH.mitochondrial.interconversion.           | F    | 0             | Observed only in uncultured samples. |
| Uncultured.Only | PWY.7279;aerobic.respiration.II.(cytochrome.c).(yeast)                | F    | 0             | Observed only in uncultured samples. |
| Uncultured.Only | PWY.7283;wybutosine.biosynthesis                                      | F    | 0             | Observed only in uncultured samples. |
| Uncultured.Only | PWY.7290;Escherichia.coli.serotype.O86.O.antigen.biosynthesis         | F    | 0             | Observed only in uncultured samples. |
| Uncultured.Only | PWY.7294;xyllose.degradation.IV                                       | F    | 0             | Observed only in uncultured samples. |
| Uncultured.Only | PWY.7323;superpathway.of.GDP.mannose.derived.O.antigen.buildin        | F    | 0             | Observed only in uncultured samples. |
| Uncultured.Only | PWY.7328;superpathway.of.UDP.glucose.derived.O.antigen.building.      | F    | 0             | Observed only in uncultured samples. |
| Uncultured.Only | PWY.7384;anaerobic.energy.metabolism.(invertibrates.mitochondria      | F    | 0             | Observed only in uncultured samples. |
| Uncultured.Only | PWY.7413;dTDP.6.deoxy.alpha.D.allose.biosynthesis                     | F    | 0             | Observed only in uncultured samples. |
| Uncultured.Only | PWY.7527;L.methionine.salvage.cycle.III                               | F    | 0             | Observed only in uncultured samples. |
| Uncultured.Only | PWY.7579;phycourobilin.biosynthesis                                   | F    | 0             | Observed only in uncultured samples. |
| Uncultured.Only | PWY.7592;arachidonate.biosynthesis.III.(metazoa)                      | F    | 0             | Observed only in uncultured samples. |
| Uncultured.Only | PWY.7616;methanol.oxidation.to.carbon.dioxide                         | F    | 0             | Observed only in uncultured samples. |
| Uncultured.Only | PWY.7619;juniperonate.biosynthesis                                    | F    | 0             | Observed only in uncultured samples. |
| Uncultured.Only | PWY.7663;gondoate.biosynthesis.(anaerobic)                            | F    | 0             | Observed only in uncultured samples. |
| Uncultured.Only | PWY.821;superpathway.of.sulfur.amino.acid.biosynthesis.(Saccharo      | F    | 0             | Observed only in uncultured samples. |
| Uncultured.Only | PWY0.1297;superpathway.of.purine.deoxyribonucleosides.degradati       | F    | 0             | Observed only in uncultured samples. |
| Uncultured.Only | PWY0.1319;CDP.diacylglycerol.biosynthesis.II                          | F    | 0             | Observed only in uncultured samples. |
| Uncultured.Only | PWY0.1338;polymyxin.resistance                                        | F    | 0             | Observed only in uncultured samples. |



| Category        | Pathway                                                           | Incl | Prev Criteria |                                      |
|-----------------|-------------------------------------------------------------------|------|---------------|--------------------------------------|
| Uncultured.Only | PWY0.1415;superpathway.of.heme.biosynthesis.from.uroporphyrinoc   | F    | 0             | Observed only in uncultured samples. |
| Uncultured.Only | PWY0.1479;tRNA.processing                                         | F    | 0             | Observed only in uncultured samples. |
| Uncultured.Only | PWY0.1533;methylphosphonate.degradation.I                         | F    | 0             | Observed only in uncultured samples. |
| Uncultured.Only | PWY0.162;superpathway.of.pyrimidine.ribonucleotides.de.novo.biosy | F    | 0             | Observed only in uncultured samples. |
| Uncultured.Only | PWY0.41;allantoin.degradation.IV.(anaerobic)                      | F    | 0             | Observed only in uncultured samples. |
| Uncultured.Only | PWY0.781;aspartate.superpathway                                   | F    | 0             | Observed only in uncultured samples. |
| Uncultured.Only | PWY0.845;superpathway.of.pyridoxal.5.phosphate.biosynthesis.and.s | F    | 0             | Observed only in uncultured samples. |
| Uncultured.Only | PWY0.862;(5Z).dodec.5.enoate.biosynthesis                         | F    | 0             | Observed only in uncultured samples. |
| Uncultured.Only | PWY1F.823;leucopelargonidin.and.leucocyanidin.biosynthesis        | F    | 0             | Observed only in uncultured samples. |
| Uncultured.Only | PWY3DJ.35471;L.ascorbate.biosynthesis.IV                          | F    | 0             | Observed only in uncultured samples. |
| Uncultured.Only | PWY3O.1109;superpathway.of.4.hydroxybenzoate.biosynthesis.(yeas   | F    | 0             | Observed only in uncultured samples. |
| Uncultured.Only | PWY3O.355;stearate.biosynthesis.III.(fungi)                       | F    | 0             | Observed only in uncultured samples. |
| Uncultured.Only | PWY490.3;nitrate.reduction.VI.(assimilatory)                      | F    | 0             | Observed only in uncultured samples. |
| Uncultured.Only | PWY4FS.7;phosphatidylglycerol.biosynthesis.I.(plastidic)          | F    | 0             | Observed only in uncultured samples. |
| Uncultured.Only | PWY4FS.8;phosphatidylglycerol.biosynthesis.II.(non.plastidic)     | F    | 0             | Observed only in uncultured samples. |
| Uncultured.Only | PWY5F9.12;biphenyl.degradation                                    | F    | 0             | Observed only in uncultured samples. |
| Uncultured.Only | PWY66.201;nicotine.degradation.IV                                 | F    | 0             | Observed only in uncultured samples. |
| Uncultured.Only | PWY66.367;ketogenesis                                             | F    | 0             | Observed only in uncultured samples. |
| Uncultured.Only | PWY66.374;C20.prostanoid.biosynthesis                             | F    | 0             | Observed only in uncultured samples. |
| Uncultured.Only | PWY66.388;fatty.acid.alpha.oxidation.III                          | F    | 0             | Observed only in uncultured samples. |
| Uncultured.Only | PWY66.398;TCA.cycle.III.(animals)                                 | F    | 0             | Observed only in uncultured samples. |
| Uncultured.Only | SPHINGOLIPID.SYN.PWY;sphingolipid.biosynthesis.(yeast)            | F    | 0             | Observed only in uncultured samples. |
| Uncultured.Only | SUCSYN.PWY;sucrose.biosynthesis.I.(from.photosynthesis)           | F    | 0             | Observed only in uncultured samples. |
| Uncultured.Only | TRIGLSYN.PWY;diacylglycerol.and.triacylglycerol.biosynthesis      | F    | 0             | Observed only in uncultured samples. |
| Uncultured.Only | TRYPTOPHAN.DEGRADATION.1;L.tryptophan.degradation.III.(eukai      | F    | 0             | Observed only in uncultured samples. |
| Uncultured.Only | URDEGR.PWY;superpathway.of.allantoin.degradation.in.plants        | F    | 0             | Observed only in uncultured samples. |
